# Supplementary material for: Analysis of cnidarian Gcm suggests a neuronal origin of glial EAAT1 function
Source: PubMed Central journal article supplement (PMC10491807; doi:10.1038/s41598-023-42046-9), 2023-09-08
Supplement: 41598_2023_42046_MOESM1_ESM.pdf [file 41598_2023_42046_MOESM1_ESM.pdf]

# Analysis of cnidarian Gcm suggests a neuronal origin of glial EAAT1 function.

Larisa Sheloukhova and Hiroshi Watanabe\*

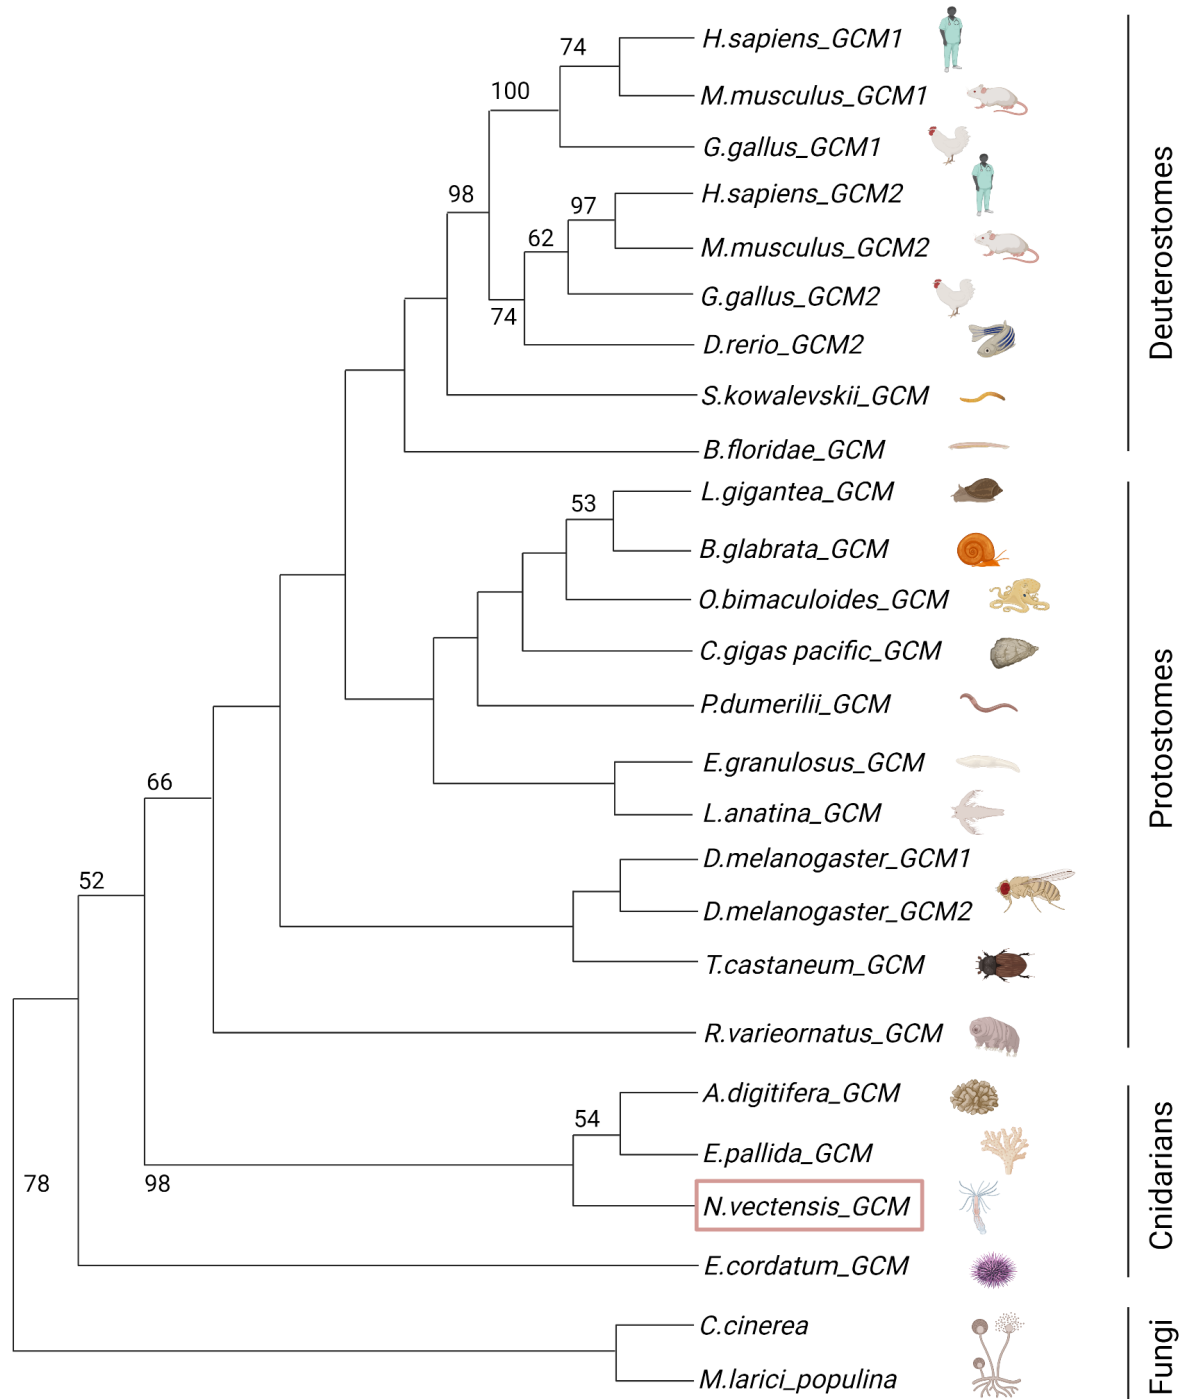

**Supplementary Figure 1. Phylogeny of GCM in metazoans.** Among basal metazoans, the GCM domain is conserved only in *Cnidaria*. Support values >50 are shown at the basal nodes. *Nematostella* GCM is framed in red.



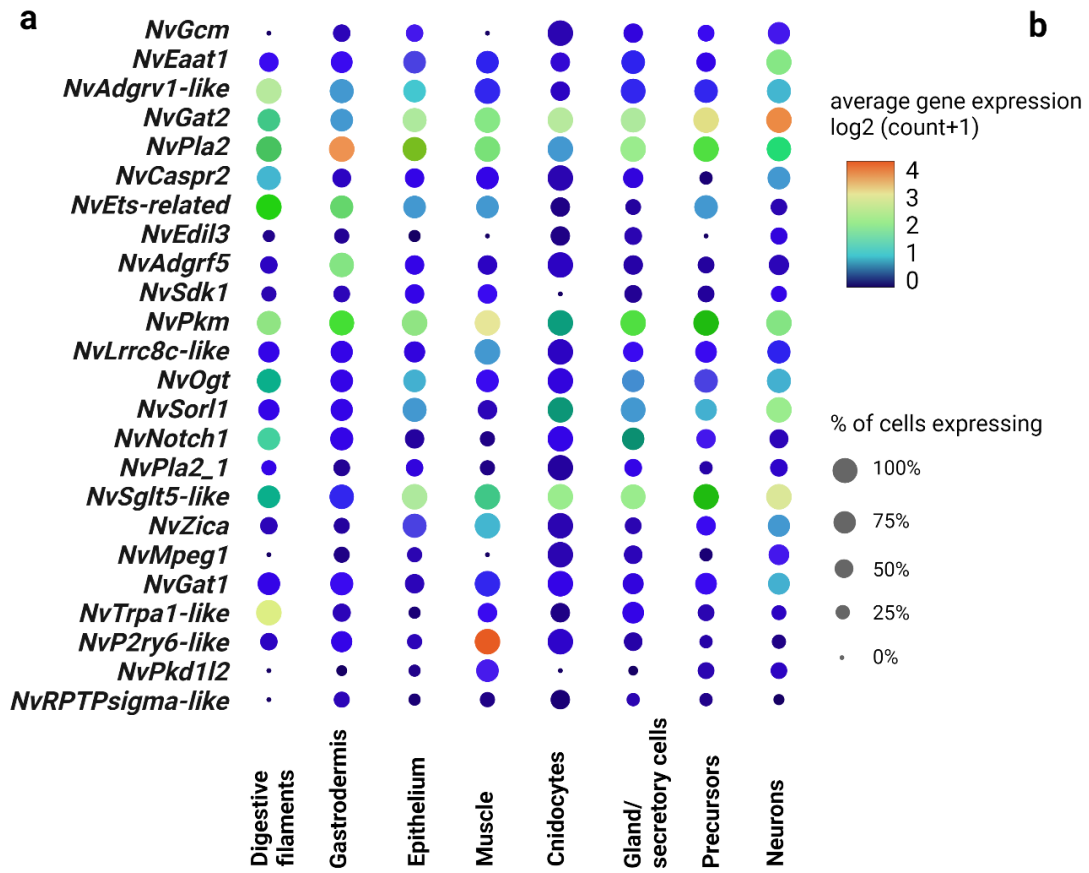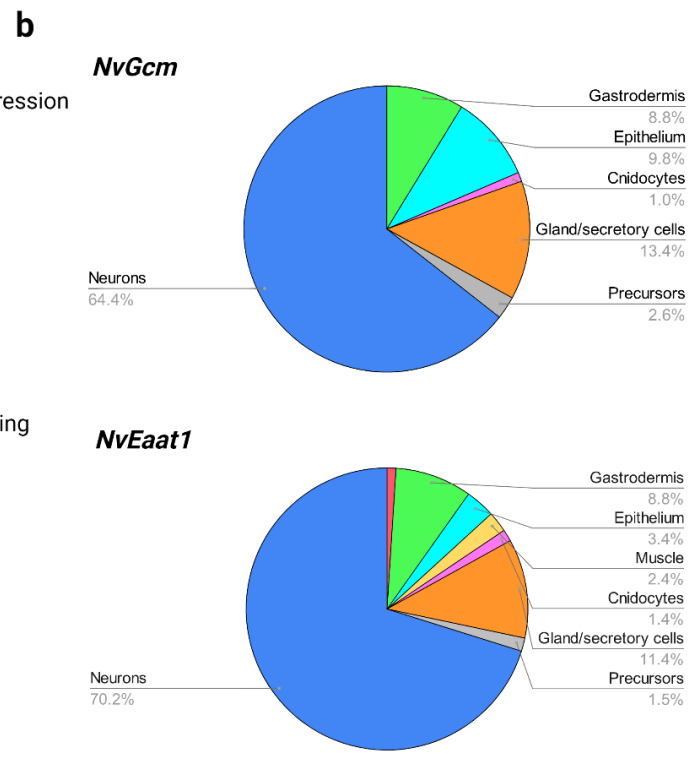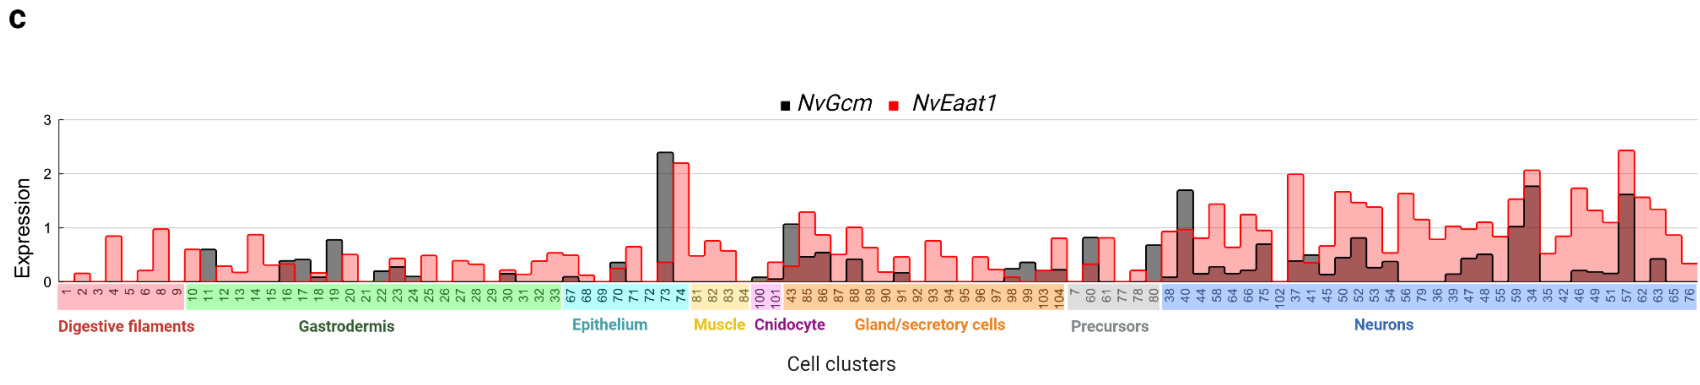

**Supplementary Figure 3. Expression of *NvGcm* and genes affected by *NvGcm* KD.** (a) Average normalized expression of the genes across cell types and the percentage of cell clusters within each cell type expressing the genes in adult animals is shown. For normalization, the raw UMI count of each gene was divided by the total detected RNAs in each cell cluster, multiplied by a scale factor (10,000), a pseudo-count (1) was then added, and the result was log2 transformed. (b) Distribution of *NvGcm* and *NvEaat1* expression across cell types in adult animals: both genes are predominantly expressed in neurons. (c) Normalized expression of *NvGcm* and *NvEaat1* across cell clusters in adult animals are shown.

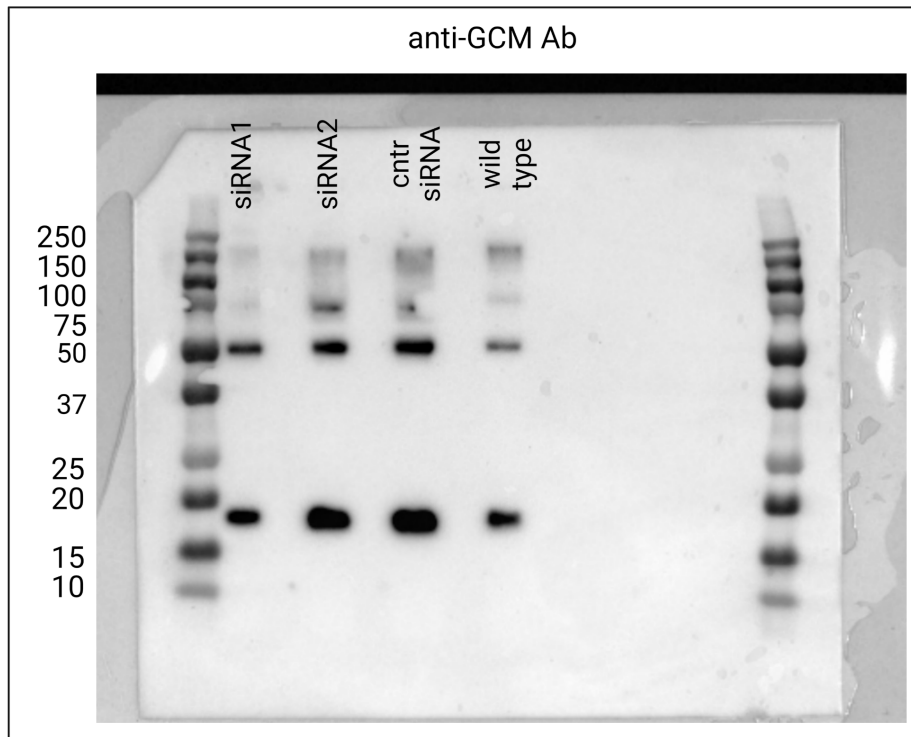

**Supplementary Figure 4. An antibody generated specifically for NvGCM lacks specificity producing multiple bands on Western blots.** NvGCM-specific siRNA knockdown did not change the band pattern also suggesting the lack of antibody specificity. Western blots were probed with the antibody 1:1000 dilution.

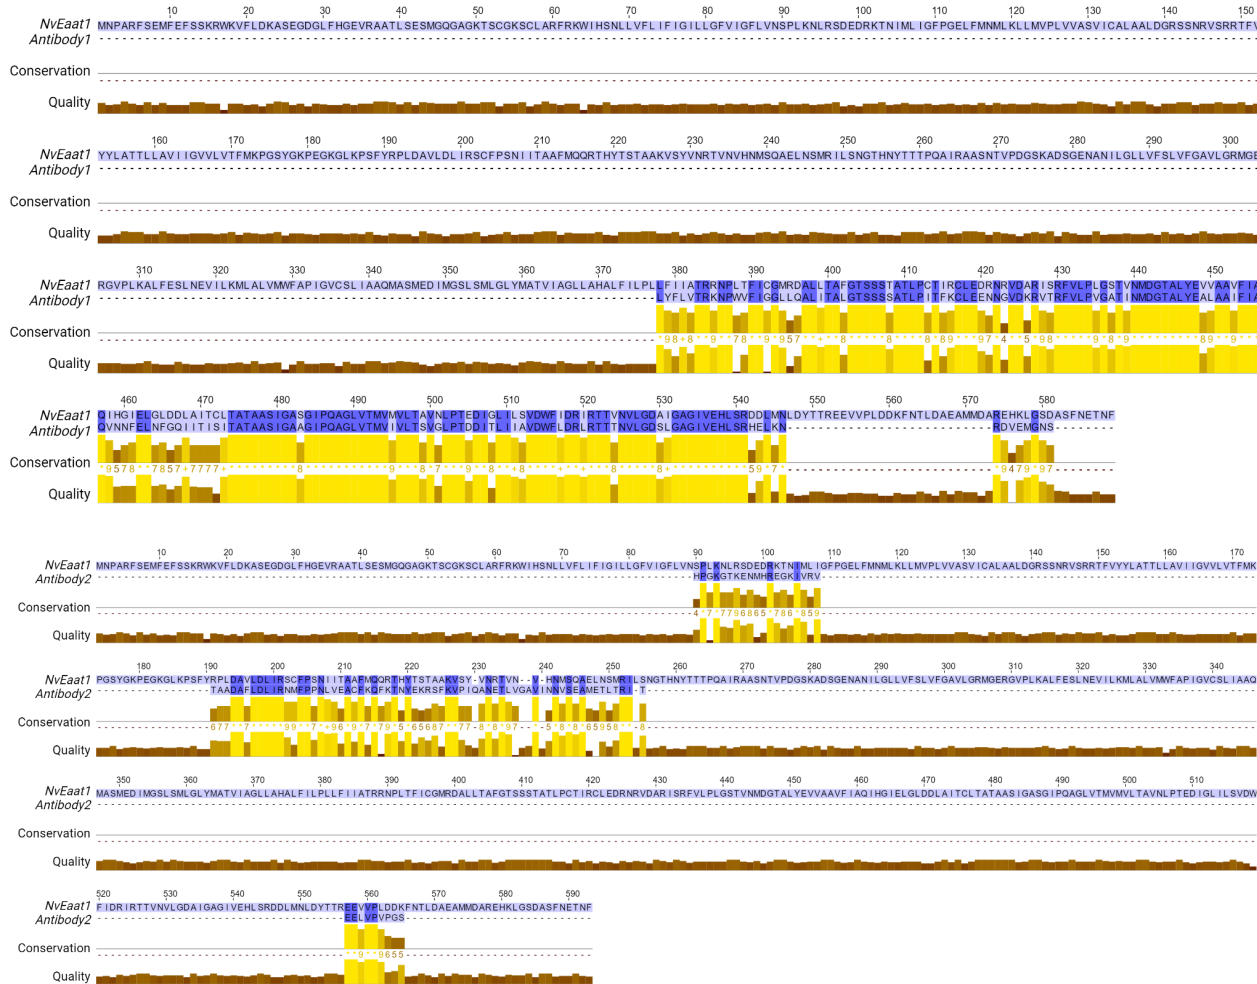

**Supplementary Figure 5. Alignment of *Nematostella* EAAT1 and epitope sequences of two antibodies.** Antibody 1 is anti-Eaat1 antibody by German Research Products; Antibody 2 is anti-human EAAT1/Glast-1 antibody by Bio-Techne. The sequences were aligned in the T-coffee program with the structural alignment (Espresso) method (Di Tommaso et al., 2011). Image created with JalView Version 2 (Waterhouse et al., 2009).

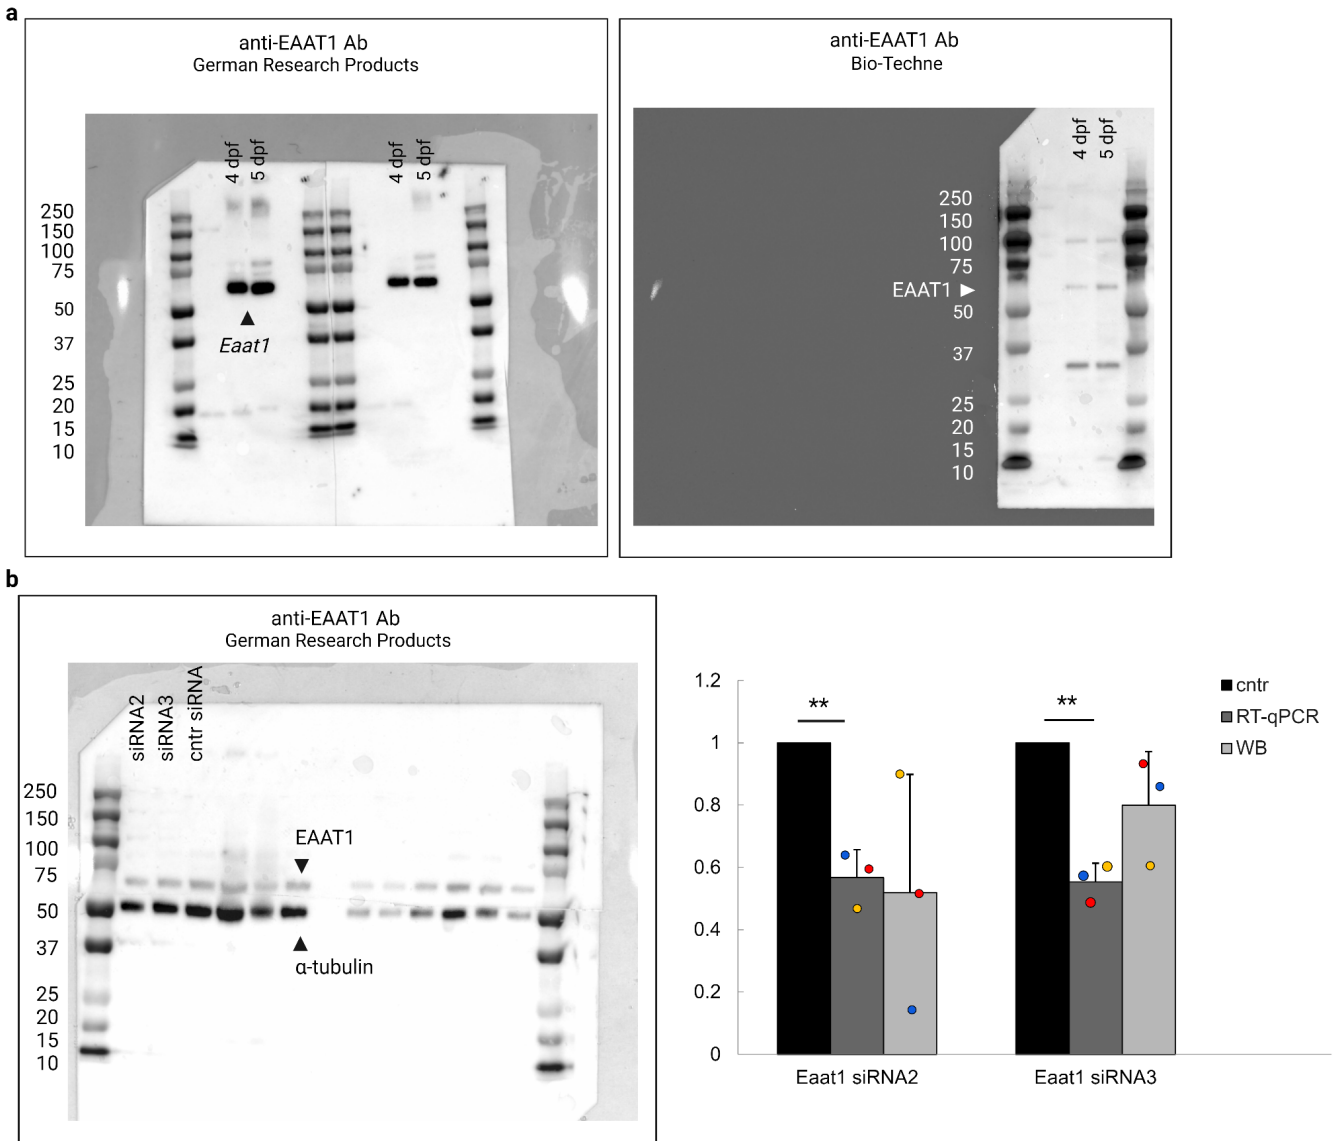

**Supplementary Figure 6. Commercially available Anti-EAAT1 antibodies seem to recognize NvEAAT1.** (a) Western blots probed with German Research Products anti-EAAT1 antibody (left) and Bio-Techne anti-EAAT1 antibody (right). Specific bands of ~65 kDa are detected with both antibodies as expected based on the *Nematostella* EAAT1 protein sequence. (b) Left: Western blot with a loading control (*α-tubulin*) to compare the relative expression of NvEAAT1 in KD vs. control samples probed with German Research Products anti-EAAT1 antibody. Right: expression change (fold change) of *NvEaat1* following KD analyzed by RT-qPCR and WB. Data are given mean ±SD, N=3, \*\*p < 0.01, unpaired t-test.



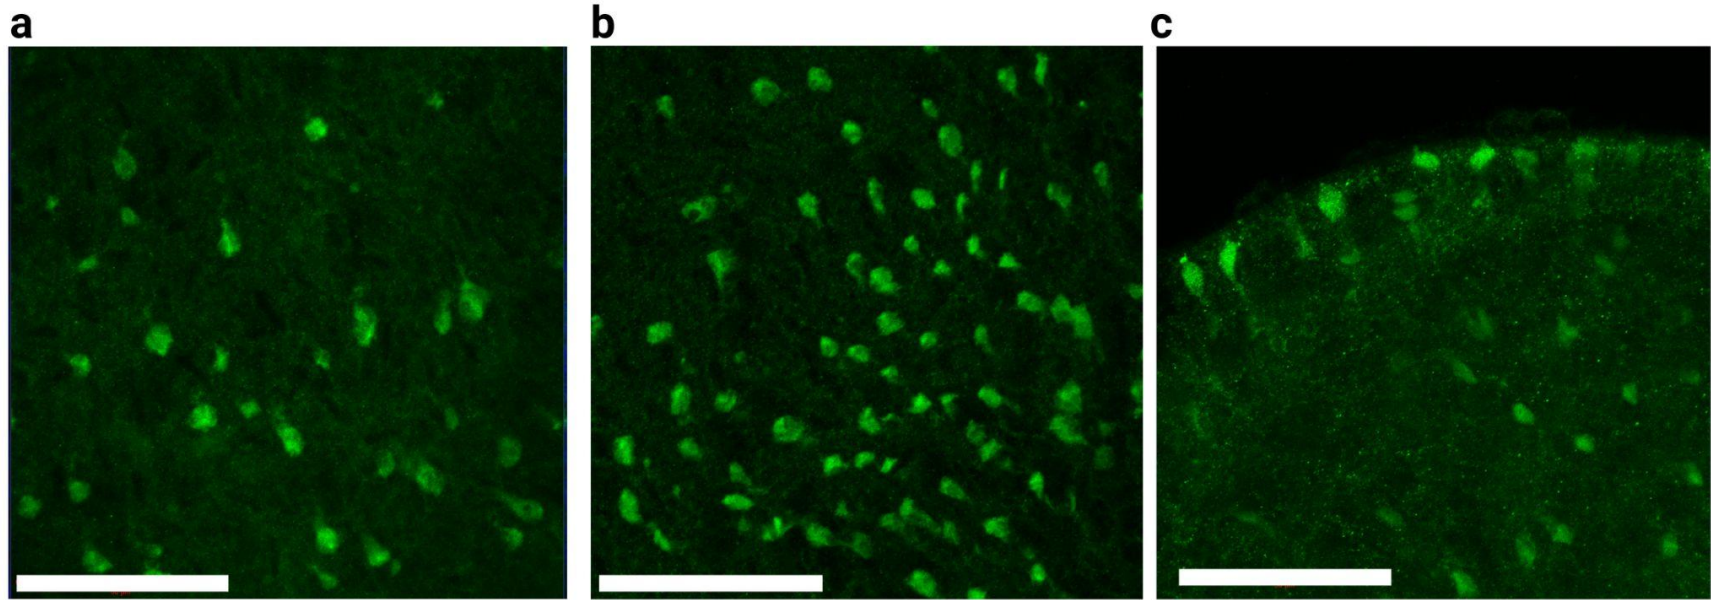

**Supplementary Figure 7. Morphology of NvEAAT1-positive cells.** EAAT1-expressing cells stained with German Research Products (rabbit) anti-EAAT1 antibody. Planula stage (5dpf) (a,b) Aboral region (c) Apical tissue. Scale bar: 50  $\mu$ m.

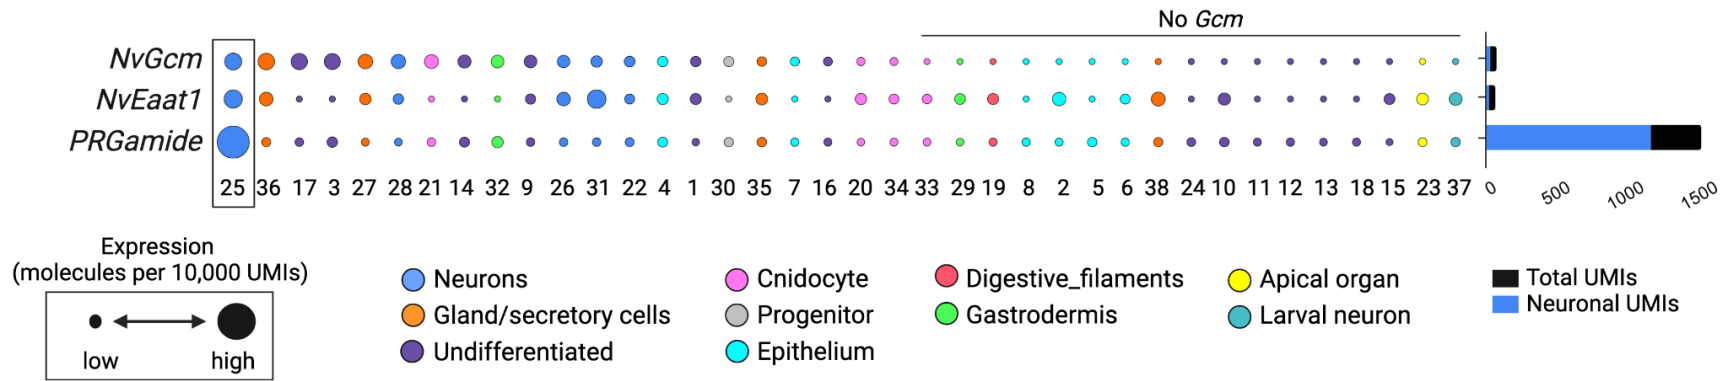

**Supplementary Figure 8. Expression of *NvGcm*, *NvEaat1* and *PRGamide* across larval cell clusters in *N. vectensis*.** Expression of the genes is based on scRNA-seq data (Sebé-Pedrós et al. 2018). The dot plot shows the normalized expression values (molecules per 10,000 UMIs) scaled by the gene. Dot size from smallest to largest corresponds to the lowest and highest expression, respectively. Cell clusters are organized left to right in the descending order of *NvGcm* expression.

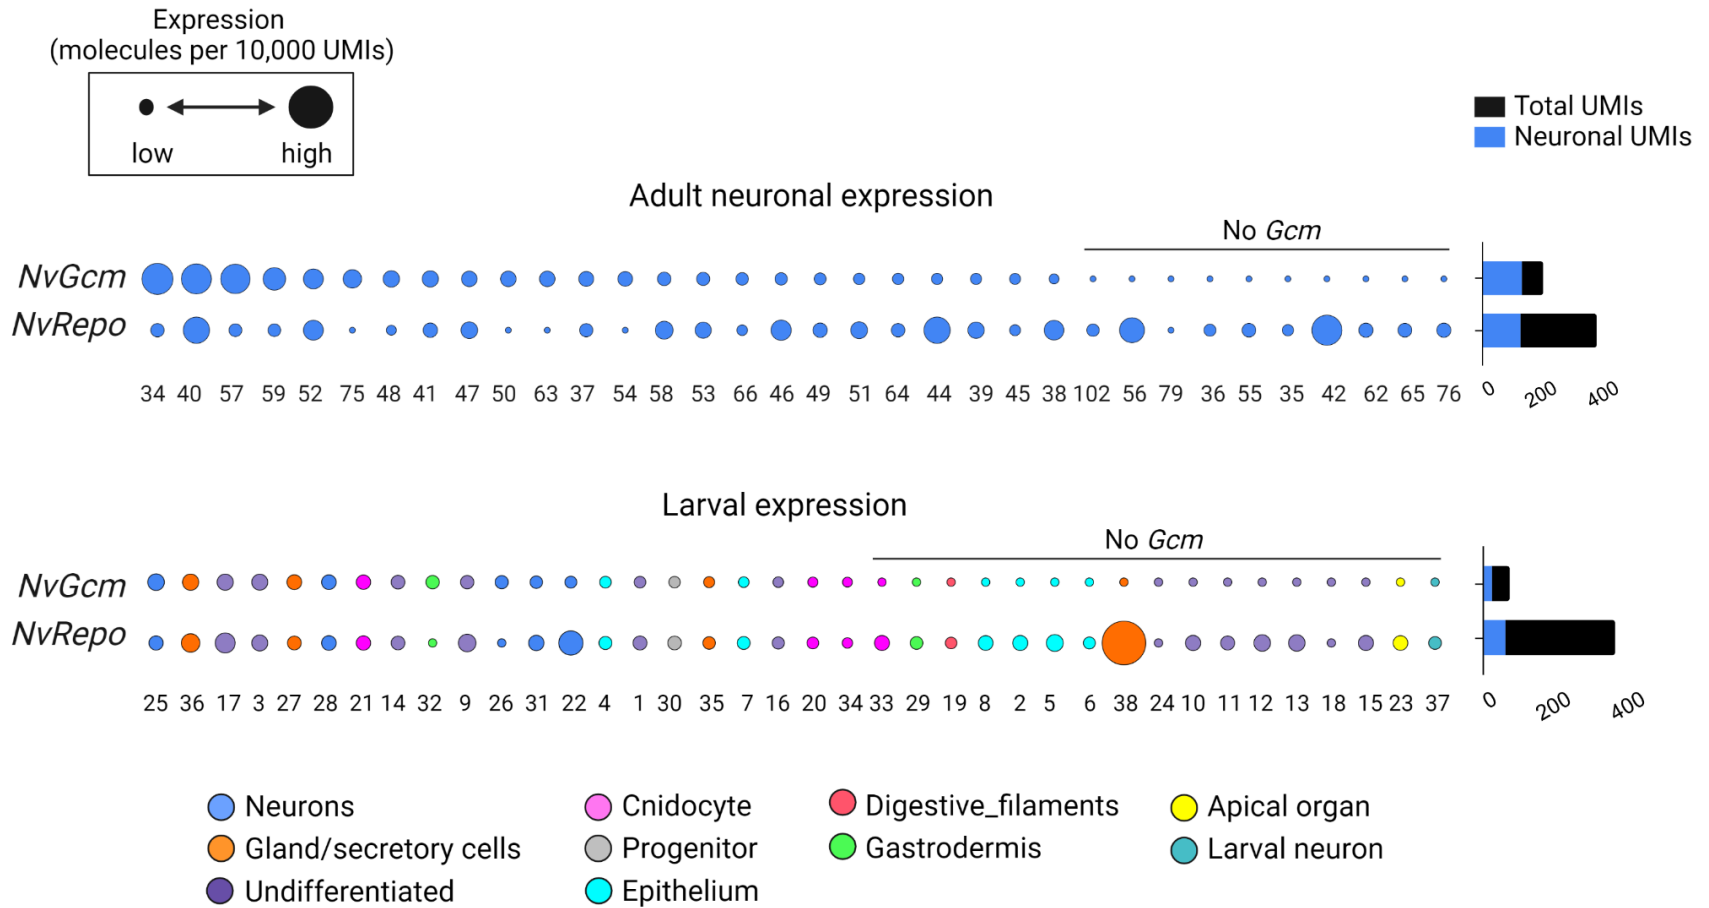

**Supplementary Figure 9. Expression of *NvRepo* and *NvGcm* across neuronal cell clusters in adult animals (top) and all the larval cell clusters (bottom).** Expression of the genes is based on scRNA-seq data (Sebé-Pedrós et al. 2018). The dot plot shows the normalized expression values (molecules per 10,000 UMIs) scaled by the gene. Dot size from smallest to largest corresponds to lowest and highest expression, respectively. Cell clusters are organized left to right in the descending order of *NvGcm* expression.

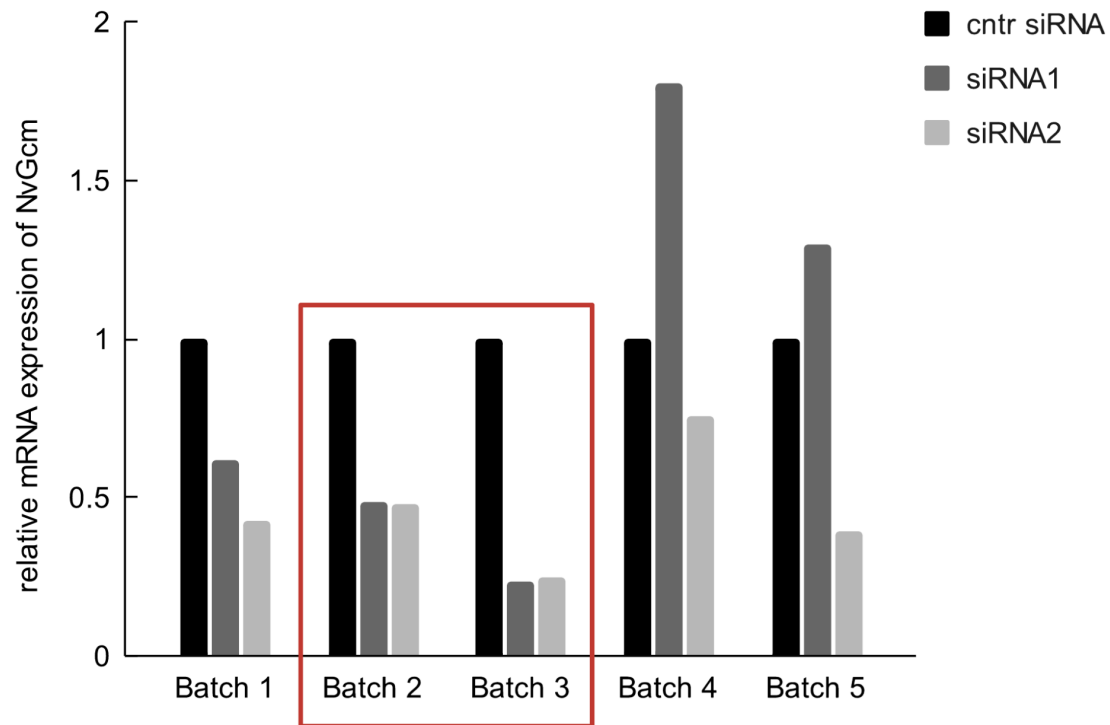

**Supplementary Figure 10. KD efficiency of *Gcm*-specific siRNAs.** KD efficiency of *Gcm*-specific siRNA1 and siRNA2 in batches used for RNA-seq. Batch 2 and Batch 3 (framed in red) were selected for DE gene analysis.

**Supplementary Table 1. Species used for GCM phylogenetic analysis. Sequences were taken from Genbank.**

| <b>Phylum</b>          | <b>Species</b>                  | <b>Gene name, Accession ID</b> |
|------------------------|---------------------------------|--------------------------------|
| <i>Chordata</i>        | <i>Homo sapiens</i>             | GCM1, EAX04412.1               |
|                        |                                 | GCM2, NP004743                 |
|                        | <i>Mus musculus</i>             | GCM1, EDL26359.1               |
|                        |                                 | GCM2, NP_032130                |
|                        | <i>Gallus gallus</i>            | GCM1, AAR24261                 |
|                        |                                 | GCM2, BAD72825                 |
| <i>Danio rerio</i>     | GCM2, AAI62304                  |                                |
| <i>Hemichordata</i>    | <i>Saccoglossus kowalevskii</i> | GCM, NP_001161553              |
| <i>Cephalochordata</i> | <i>Branchiostoma floridae</i>   | GCM, XP_002z591781             |
| <i>Arthropoda</i>      | <i>Drosophila melanogaster</i>  | GCM1, AAC46912                 |
|                        | <i>Drosophila melanogaster</i>  | GCM2, NP_609302                |
|                        | <i>Tribolium castaneum</i>      | GCM, EFA04430                  |
| <i>Mollusca</i>        | <i>Lottia gigantea</i>          | GCM, XP_009048823              |
|                        | <i>Biomphalaria glabrata</i>    | GCM, XP_013078709              |
|                        | <i>Octopus bimaculoides</i>     | GCM, XP_014777859              |
|                        | <i>Crassostrea gigas</i>        | GCM, EKC24558                  |
| <i>Annelida</i>        | <i>Platynereis dumerilii</i>    | GCM, CCK33024                  |
| <i>Platyhelminthes</i> | <i>Echinococcus granulosus</i>  | GCM, CDS20483                  |

|                      |                                    |                                |
|----------------------|------------------------------------|--------------------------------|
| <i>Brachiopoda</i>   | <i>Lingula anatina</i>             | GCM, XP_013399310              |
| <i>Echinodermata</i> | <i>Echinocardium cordatum</i>      | GCM, BAS66823                  |
| <i>Tardigrada</i>    | <i>Ramazzottius varieornatus</i>   | GCM, GAU98972                  |
| <i>Cnidaria</i>      | <i>Acropora digitifera</i>         | GCM, XP_015774704              |
|                      | <i>Exaiptasia pallida</i>          | GCM, KXJ08668                  |
|                      | <i>Nematostella vectensis</i>      | GCM, EDO25565                  |
| <i>Fungi</i>         | <i>Coprinopsis cinerea okayama</i> | Hypothetical protein, EAU87004 |
|                      | <i>Melampsora larici-populina</i>  | Hypothetical protein, EGG12299 |

**Supplementary Table 2. GO terms and function (UniProt) of DE genes grouped by p-adj.** Genes used for RT-qPCR verification are highlighted in **yellow**.

| <b>P-adj &lt; 0.05, downregulated</b> |                       |                                                                                                                                                                                            |                                   |
|---------------------------------------|-----------------------|--------------------------------------------------------------------------------------------------------------------------------------------------------------------------------------------|-----------------------------------|
| <b>Nv_vienna_ID</b>                   | <b>NCBI_accession</b> | <b>Function /BLAST hit</b>                                                                                                                                                                 | <b>GO/KEGG pathway</b>            |
| NVE38                                 | XM_001641976          | pyruvate kinase PKM. PKM2 inhibition increases substrate flux through the pentose phosphate pathway to generate reducing equivalents (NADPH and GSH) and protect against oxidative stress. | carbohydrate/energy metabolism    |
| NVE22599                              | XM_032367192          | uncharacterized, blastp - no hit                                                                                                                                                           | uncharacterized/cnidaria-specific |
| NVE21209                              | XM_032376191          | uncharacterized, blastp - no hit                                                                                                                                                           | uncharacterized/cnidaria-specific |
| NVE11899                              | XM_001641371          | uncharacterized, blast hit - [Acropora] TNF receptor-associated factor 5-like                                                                                                              | uncharacterized/cnidaria-specific |
| NVE6277                               | XM_032376361          | collagen alpha-4 chain, integrin-like                                                                                                                                                      | ECM/cell adhesion                 |
| NVE13045                              | XM_032366926          | uncharacterized, blastp - no hit                                                                                                                                                           | uncharacterized/cnidaria-specific |
| NVE14657                              | XM_032376191          | uncharacterized, blastp - no hit                                                                                                                                                           | uncharacterized/cnidaria-specific |
| NVE12839                              | XM_032366921          | uncharacterized, blastp - no hit                                                                                                                                                           | uncharacterized/cnidaria-specific |
| NVE17933                              | XM_032370086          | uncharacterized, blastp - no hit                                                                                                                                                           | uncharacterized/cnidaria-specific |
| NVE7172                               | XM_032371668          | uncharacterized, blastp - no hit                                                                                                                                                           | uncharacterized/cnidaria-specific |
| NVE12840                              | XM_032366924          | uncharacterized, blastp - no hit                                                                                                                                                           | uncharacterized/cnidaria-specific |
| NVE13565                              | XR_004291976          | ncRNA                                                                                                                                                                                      | ncRNA                             |
| NVE24747                              | XR_004296070          | misc_RNA                                                                                                                                                                                   | misc_RNA                          |
| NVE4321                               | XM_032377551          | supwaprin-a (antimicrobial)                                                                                                                                                                | immune response                   |
| NVE13564                              | XM_032387386          | sortilin-related receptor, neuronal apolipoprotein E receptor, the gene for which is predominantly expressed in the central nervous system                                                 | lipid metabolism                  |
| NVE22531                              | XM_032375707          | uncharacterized, blastp - no hit                                                                                                                                                           | uncharacterized/cnidaria-specific |

|          |              |                                                                                                                                                                                                                                                                                                                                                       |                                   |
|----------|--------------|-------------------------------------------------------------------------------------------------------------------------------------------------------------------------------------------------------------------------------------------------------------------------------------------------------------------------------------------------------|-----------------------------------|
| NVE25055 | XM_032368708 | receptor-type tyrosine-protein phosphatase kappa, blast hit - PTPRD (Receptor-type tyrosine-protein phosphatase delta), can bidirectionally induce pre- and post-synaptic differentiation of neurons by mediating interaction with IL1RAP and IL1RAPL1 trans-synaptically. Involved in pre-synaptic differentiation through interaction with SLITRK2. | protein modification              |
| NVE831   | XM_032380069 | blast hit - mucin-3A-like isoform X2 [Stylophora pistillata], major glycoprotein component of a variety of mucus gels. Thought to provide a protective, lubricating barrier against particles and infectious agents at mucosal surfaces. May be involved in ligand binding and intracellular signaling.                                               | TF/transcription                  |
| NVE24010 | none         | uncharacterized, blastp - no hit                                                                                                                                                                                                                                                                                                                      | uncharacterized/cnidaria-specific |
| NVE24376 | XM_032381802 | UBX protein domain is found in ubiquitin-regulatory proteins, which are members of the ubiquitination pathway, as well as a number of other ubiquitin-like proteins including FAF-1 (FAS-associated factor 1), required for the progression of DNA replication forks by targeting DNA replication licensing factor CDT1 for degradation               | protein modification              |
| NVE16319 | XM_032366645 | E3 ubiquitin-protein ligase TM129, transmembrane protein, involved in ER-associated protein degradation                                                                                                                                                                                                                                               | protein degradation               |
| NVE3633  | XM_032366195 | uncharacterized, blast hit - Intraflagellar transport protein 172 (coral)                                                                                                                                                                                                                                                                             | uncharacterized/cnidaria-specific |
| NVE22208 | XM_032369057 | uncharacterized, blast - no hit                                                                                                                                                                                                                                                                                                                       | uncharacterized/cnidaria-specific |
| NVE3634  | none         | uncharacterized, blast hits - hypothetical proteins in corals                                                                                                                                                                                                                                                                                         | uncharacterized/cnidaria-specific |
| NVE3381  | XR_004294124 | ncRNA                                                                                                                                                                                                                                                                                                                                                 | ncRNA                             |
| NVE14629 | XM_032371431 | uncharacterized, blast - hypothetical proteins in corals                                                                                                                                                                                                                                                                                              | uncharacterized/cnidaria-specific |
| NVE5822  | XM_032367471 | uncharacterized, blast hit - E3 ubiquitin-protein ligase DZIP3 [Exaiptasia pallida], mediates ubiquitination and subsequent proteasomal degradation of target proteins                                                                                                                                                                                | protein degradation               |
| NVE2774  | XM_032375707 | uncharacterized, blast - no hit                                                                                                                                                                                                                                                                                                                       | uncharacterized/cnidaria-specific |
| NVE830   | XM_032380063 | contactin-associated protein-like 2 (CNTNAP2)                                                                                                                                                                                                                                                                                                         | ECM/cell adhesion                 |



|          |              |                                                                                                                                                                                                                                                                                                                                                                                                             |                                          |
|----------|--------------|-------------------------------------------------------------------------------------------------------------------------------------------------------------------------------------------------------------------------------------------------------------------------------------------------------------------------------------------------------------------------------------------------------------|------------------------------------------|
| NVE18730 | XM_032384910 | blast hit - Polycystic kidney disease protein 1-like 3 [Exaiptasia pallida], Component of a calcium channel. May act as a sour taste receptor by forming a calcium channel with PKD1L3 in gustatory cells                                                                                                                                                                                                   | Membrane transport                       |
| NVE15740 | XM_032372064 | uncharacterized, blast hits - hypothetical proteins from corals and molluscs                                                                                                                                                                                                                                                                                                                                | uncharacterized/cnidaria-specific        |
| NVE2552  | XM_032368045 | Integrase zinc core domain, blast hit - TNF receptor-associated factor 3 [Stylophora pistillata] an essential constituent of several E3 ubiquitin-protein ligase complexes. May have E3 ubiquitin-protein ligase activity and promote 'Lys-63'-linked ubiquitination of target proteins.                                                                                                                    | Protein synthesis/processing/degradation |
| NVE8261  | XM_032366377 | Neurogenic locus notch homolog protein 1 and Notch 2                                                                                                                                                                                                                                                                                                                                                        | Notch signaling                          |
| NVE10736 | XM_032372378 | blast hit - Transposon Ty3-G Gag-Pol polyprotein [Exaiptasia pallida]                                                                                                                                                                                                                                                                                                                                       | uncharacterized/cnidaria-specific        |
| NVE141   | XM_032367644 | ADGRL4, adhesion G protein-coupled receptor L4, Endothelial orphan receptor that acts as a key regulator of angiogenesis                                                                                                                                                                                                                                                                                    | ECM/Cell adhesion                        |
| NVE13473 | XM_032367885 | Replication factor C subunit 1. The elongation of primed DNA templates by DNA polymerase delta and epsilon requires the action of the accessory proteins PCNA and activator 1. This subunit binds to the primer-template junction. Binds the PO-B transcription element as well as other GA rich DNA sequences. Could play a role in DNA transcription regulation as well as DNA replication and/or repair. | DNA replication/repair                   |
| NVE8653  | AB231867     | TF, zinc finger protein ZIC4 (Zinc finger protein of the cerebellum 4) is involved in neurogenesis                                                                                                                                                                                                                                                                                                          | TFs/transcription                        |
| NVE5670  | XM_032376697 | sushi, von Willebrand factor type A, EGF and pentraxin domain-containing protein 1 (SVEP1), May play a role in the cell attachment process, multi-domain cell adhesion protein, homologous to the mouse polydom protein, which has been shown to mediate cell-cell adhesion in an integrin dependent-manner in osteogenic cells                                                                             | ECM/Cell adhesion                        |
| NVE16480 | XM_032382916 | blast hit - E3 ubiquitin-protein ligase DZIP3 [Exaiptasia pallida]                                                                                                                                                                                                                                                                                                                                          | protein degradation                      |
| NVE26003 | XM_032380640 | uncharacterized                                                                                                                                                                                                                                                                                                                                                                                             | uncharacterized/cnidaria-specific        |
| NVE12641 | XM_032372363 | vicilin-like seed storage protein At2g18540, Seed storage protein.                                                                                                                                                                                                                                                                                                                                          | TFs/transcription                        |
| NVE13485 | XM_032372265 | uncharacterized, blast hit - ATP-binding cassette sub-family D member 3 [Labeo rohita]                                                                                                                                                                                                                                                                                                                      | uncharacterized/cnidaria-specific        |

|          |                               |                                                                                                                                                                                                                                                                                                 |                                              |
|----------|-------------------------------|-------------------------------------------------------------------------------------------------------------------------------------------------------------------------------------------------------------------------------------------------------------------------------------------------|----------------------------------------------|
| NVE18507 | XM_032366926                  | uncharacterized, blastp hit - none                                                                                                                                                                                                                                                              | uncharacterized/cnidaria-specific            |
| NVE13487 | XM_032375749                  | uncharacterized, blast hit - hypothetical protein [Nostoc sp. T09]                                                                                                                                                                                                                              | uncharacterized/cnidaria-specific            |
| NVE7065  | XM_001627778                  | uncharacterized, TSP1 superfamily domain, blast hit - cell surface glycoprotein 1 [Exaiptasia pallida]                                                                                                                                                                                          | ECM/cell adhesion                            |
| NVE7280  | XM_032375568                  | arginine and glutamate-rich protein 1-A, is required for the oestrogen-dependent expression of ESR1 target genes. It functions in cooperation with MED1                                                                                                                                         | TFs/transcription                            |
| NVE18121 | XR_004295795                  | ncRNA                                                                                                                                                                                                                                                                                           | ncRNA                                        |
| NVE9285  | none                          | uncharacterized, blast - no hit                                                                                                                                                                                                                                                                 | uncharacterized/cnidaria-specific            |
| NVE20550 | XM_032369412                  | EGF-like repeat and discoidin I-like domain-containing protein 3. EDIL3 is a glycoprotein that is secreted by endothelial cells and can associate with the endothelial cell surface and the extracellular matrix.                                                                               | ECM/cell adhesion                            |
| NVE10760 | XM_032373473                  | cell wall protein DAN4-like, DAN4 in yeast is a component of the cell wall                                                                                                                                                                                                                      | membrane transport                           |
| NVE13391 | XM_032372047                  | uncharacterized, Corresponds to Merops family A17. These proteins are homologous to aspartic proteinases encoded by retroposons and retroviruses.                                                                                                                                               | RT/retrotransposons                          |
| NVE8561  | XM_032374855                  | organic cation transporter protein (OCTN1). An organic cation transport protein mediates the transport of organic cations across the cell membrane. These proteins are members of the solute carrier family, subfamily 22.                                                                      | membrane transport                           |
| NVE18120 | XR_004296913,<br>XM_032385195 | ncRNA                                                                                                                                                                                                                                                                                           | ncRNA                                        |
| NVE444   | XM_001631508                  | YTH domain-containing protein 1, Regulator of alternative splicing that specifically recognizes and binds N6-methyladenosine (m6A)-containing RNAs, directs different complexes to regulate RNA signaling pathways, such as RNA metabolism, RNA splicing, RNA folding, and protein translation. | RNA splicing                                 |
| NVE9694  | XM_032374129                  | peroxisomal N(1)-acetyl-spermine/spermidine oxidase, Flavoenzyme which catalyzes the oxidation of N1-acetylspermine to spermidine and is thus involved in the polyamine back-conversion                                                                                                         | lipid metabolism                             |
| NVE18446 | XM_032375707                  | uncharacterized, blast - no hit                                                                                                                                                                                                                                                                 | uncharacterized/cnidaria-specific            |
| NVE3596  | XM_032377969                  | Sorting nexin-13, RGS-PX1 is a member of both the regulator of G protein signaling (RGS) and sorting nexin (SNX) protein families.                                                                                                                                                              | Protein synthesis/processing/<br>degradation |

|          |              |                                                                                                                                                                                                                                                                                                                                                                                                                                                                                               |                                   |
|----------|--------------|-----------------------------------------------------------------------------------------------------------------------------------------------------------------------------------------------------------------------------------------------------------------------------------------------------------------------------------------------------------------------------------------------------------------------------------------------------------------------------------------------|-----------------------------------|
| NVE22605 | XM_032376127 | blast hit - extensin-like mRNA, extensins are a family of flexuous, rodlike, hydroxyproline-rich glycoproteins (HRGPs) of the plant cell wall or zonadhesin (salmon match). This gene encodes a protein that functions in the species specificity of sperm adhesion to the egg zona pellucida. The encoded protein is located in the acrosome and may be involved in signaling or gamete recognition.                                                                                         | TFs/transcription                 |
| NVE10366 | XM_032362710 | uncharacterized, blast hits - uncharacterized proteins in cnidaria and molluscs                                                                                                                                                                                                                                                                                                                                                                                                               | uncharacterized/cnidaria-specific |
| NVE12411 | XM_032372478 | bifunctional polynucleotide phosphatase/kinase, Plays a key role in the repair of DNA damage, functioning as part of both the non-homologous end-joining (NHEJ) and base excision repair (BER) pathways.                                                                                                                                                                                                                                                                                      | DNA replication/repair            |
| NVE24235 | XM_001636600 | DNA replication ATP-dependent helicase/nuclease DNA2, Key enzyme involved in DNA replication and DNA repair in nucleus and mitochondria.                                                                                                                                                                                                                                                                                                                                                      | DNA replication/repair            |
| NVE1600  | XR_004293153 | ncRNA                                                                                                                                                                                                                                                                                                                                                                                                                                                                                         | ncRNA                             |
| NVE7392  | XM_001620713 | cilia- and flagella-associated protein 74, as part of the central apparatus of the cilium axoneme may play a role in cilium movement.                                                                                                                                                                                                                                                                                                                                                         | cell motility                     |
| NVE18180 | XM_032371133 | adhesin BpaC-like, cell adhesion protein identified in bacteria                                                                                                                                                                                                                                                                                                                                                                                                                               | ECM/cell adhesion                 |
| NVE12293 | XM_032372590 | blast hit - cilia- and flagella-associated protein 99 [Delphinapterus leucas]                                                                                                                                                                                                                                                                                                                                                                                                                 | cell motility                     |
| NVE9769  | XM_032367534 | uncharacterized, blast hit - Alpha-1,6-mannosylglycoprotein 6-beta-N-acetylglucosaminyltransferase A [Exaiptasia pallida], Catalyzes the addition of N-acetylglucosamine (GlcNAc) in beta 1-6 linkage to the alpha-linked mannose of biantennary N-linked oligosaccharides, Via its role in the biosynthesis of complex N-glycans, plays an important role in the activation of cellular signaling pathways, reorganization of the actin cytoskeleton, cell-cell adhesion and cell migration. | ECM/cell adhesion                 |
| NVE22455 | XM_032365909 | polycystic kidney disease protein 1-like 2, may function as an ion-channel regulator, involved in cell-cell/matrix interactions. May function as a G-protein-coupled receptor.                                                                                                                                                                                                                                                                                                                | membrane transport                |
| NVE24871 | XM_032381419 | Cartilage matrix protein-like, is a major component of the extracellular matrix of non-articular cartilage. It binds to collagen.                                                                                                                                                                                                                                                                                                                                                             | ECM/cell adhesion                 |
| NVE12227 | XM_032386874 | uncharacterized                                                                                                                                                                                                                                                                                                                                                                                                                                                                               | uncharacterized/cnidaria-specific |
| NVE7553  | XM_032387267 | reverse transcriptase                                                                                                                                                                                                                                                                                                                                                                                                                                                                         | RT/retrotransposons               |
| NVE7577  | XM_032375405 | heterogeneous nuclear ribonucleoprotein L-like (HNRNPLL), RNA-binding protein that functions as regulator of alternative splicing for multiple target mRNAs                                                                                                                                                                                                                                                                                                                                   | RNA splicing                      |

|                                     |              |                                                                                                                                                                                                                                                                                                                                                                                                                                      |                                   |
|-------------------------------------|--------------|--------------------------------------------------------------------------------------------------------------------------------------------------------------------------------------------------------------------------------------------------------------------------------------------------------------------------------------------------------------------------------------------------------------------------------------|-----------------------------------|
| NVE21596                            | XM_032383320 | probable ATP-dependent RNA helicase DDX10 (RNA helicase).                                                                                                                                                                                                                                                                                                                                                                            | RNA splicing                      |
| NVE19901                            | XR_004292618 | misc_RNA                                                                                                                                                                                                                                                                                                                                                                                                                             | misc_RNA                          |
| NVE13277                            | XM_032372150 | potassium channel subfamily T member 1 (voltage-gated ion channels), outwardly rectifying potassium channel subunit that may coassemble with other Slo-type channel subunits. Activated by high intracellular sodium or chloride levels. Activated upon stimulation of G-protein coupled receptors, such as CHRM1 and GRIA1.                                                                                                         | membrane transport                |
| NVE24988                            | XR_004295998 | misc_RNA                                                                                                                                                                                                                                                                                                                                                                                                                             | misc_RNA                          |
| NVE17173                            | XM_032369781 | von Willebrand factor D and EGF domain-containing protein (calcium ion binding)                                                                                                                                                                                                                                                                                                                                                      | ECM/cell adhesion                 |
| NVE16596                            | XR_004297107 | ncRNA, blast hit - hypothetical proteins (Cnidaria)                                                                                                                                                                                                                                                                                                                                                                                  | ncRNA                             |
| NVE7066                             | XM_001627778 | same as NVE7065                                                                                                                                                                                                                                                                                                                                                                                                                      | ECM/cell adhesion                 |
| NVE4276                             | XM_032362635 | arginine and glutamate-rich protein 1-A (ARGLU1)                                                                                                                                                                                                                                                                                                                                                                                     | TFs/transcription                 |
| NVE20392                            | XM_032369454 | zinc finger C3H1 domain-containing protein                                                                                                                                                                                                                                                                                                                                                                                           | TFs/transcription                 |
| NVE14680                            | XR_004295795 | ncRNA, miscRNA                                                                                                                                                                                                                                                                                                                                                                                                                       | ncRNA                             |
| NVE16225                            | XM_001623467 | bZIP transcription factor-like                                                                                                                                                                                                                                                                                                                                                                                                       | TFs/transcription                 |
| NVE8051                             | XM_032367102 | sushi, von Willebrand factor type A, EGF and pentraxin domain-containing protein 1 (SVEP1), May play a role in the cell attachment process.                                                                                                                                                                                                                                                                                          | ECM/cell adhesion                 |
| NVE7655                             | XM_032375303 | predicted, blast hits - uncharacterized proteins in Chidaria, REJ domain - domain is found in PKD1 and the sperm receptor for egg jelly. The function of this domain is unknown. IPT/TIG domain. This family consists of a domain that has an immunoglobulin-like fold. These domains are found in cell surface receptors such as Met and Ron as well as in intracellular transcription factors where it is involved in DNA binding. | membrane transport                |
| <b>p-adj &lt; 0.05, upregulated</b> |              |                                                                                                                                                                                                                                                                                                                                                                                                                                      |                                   |
| NVE17843                            | XR_004296956 | miscRNA                                                                                                                                                                                                                                                                                                                                                                                                                              | miscRNA                           |
| NVE14448                            | XM_032371523 | uncharacterized                                                                                                                                                                                                                                                                                                                                                                                                                      | uncharacterized/cnidaria-specific |
| NVE5252                             | XM_032368149 | uncharacterized, blast hit- galactose-specific lectin [Anthopleura japonica]                                                                                                                                                                                                                                                                                                                                                         | uncharacterized/cnidaria-specific |
| NVE14983                            | XM_032371282 | 60S ribosomal protein L15                                                                                                                                                                                                                                                                                                                                                                                                            | ribosomal                         |

|                                      |                |                                                                                                                                                                                                                                                                                                                                                                                                                                     |                                   |
|--------------------------------------|----------------|-------------------------------------------------------------------------------------------------------------------------------------------------------------------------------------------------------------------------------------------------------------------------------------------------------------------------------------------------------------------------------------------------------------------------------------|-----------------------------------|
| NVE4717                              | XM_032364190   | uncharacterized, blast hit - Pancreatic secretory granule membrane major glycoprotein GP2 [homo sapiens], LZP variant II [Mus musculus], Zona pellucida (ZP) domain has been recognized in a number of receptor-like eukaryotic glycoproteins, which is involved in many important biological processes, such as signal transduction, development, differentiation.                                                                 | ECM/cell adhesion                 |
| NVE10004                             | XM_001626357   | adhesion G protein-coupled receptor B1 (ADGRB1 or BAI1), Phosphatidylserine receptor which enhances the engulfment of apoptotic cells.                                                                                                                                                                                                                                                                                              | ECM/cell adhesion                 |
| NVE3218                              | XM_032378343   | macrophage-expressed gene 1 protein, Macrophage Expressed Gene-1 (MPEG-1; also termed Perforin-2) is an endosomal / phagolysosomal perforin-like protein that is conserved across the metazoan kingdom and that functions within the phagolysosome to damage engulfed microbes. Plays a key role in the innate immune response following bacterial infection by inserting into the bacterial surface to form pores                  | immune response                   |
| NVE23561                             | XM_032382138   | PLA2_1 phospholipase A2 A2-actitoxin-Cgg2a, involved in Lipid metabolism (cleaves fatty acids), phospholipase A2 (PLA2), membrane associated precursor [Homo sapiens], Ca2+-requiring, secretory enzymes that have been implicated in a number of biological processes, such as modification of eicosanoid generation, inflammation, host defense, and atherosclerosis.                                                             | lipid metabolism                  |
| NVE1644                              | XM_032379490   | uncharacterized                                                                                                                                                                                                                                                                                                                                                                                                                     | uncharacterized/cnidaria-specific |
| NVE12742                             | XM_032385880   | uncharacterized                                                                                                                                                                                                                                                                                                                                                                                                                     | uncharacterized/cnidaria-specific |
| NVE2195                              | XM_032364690   | blast - galaxin-like, Galaxin, which encodes for a matrix protein suspected to be involved in calcification, is originally identified from the coral. It is hypothesized that the coral galaxin homologs are recruited as biomineralization proteins when Scleractinia diverged from non-biomineralizing taxa during the Triassic56 because galaxin-like proteins are also found in non-calcifying taxa outside Cnidaria            | uncharacterized/cnidaria-specific |
| NVE9883                              | XM_032362934.1 | uncharacterized, blast hit - ETS-related transcription factor Elf-1                                                                                                                                                                                                                                                                                                                                                                 | TFs/transcription                 |
| NVE23912                             | XM_032365681   | uncharacterized                                                                                                                                                                                                                                                                                                                                                                                                                     | uncharacterized/cnidaria-specific |
| <b>p-adj &lt; 0.1, downregulated</b> |                |                                                                                                                                                                                                                                                                                                                                                                                                                                     |                                   |
| NVE2938                              | XM_001639423   | calcineurin-binding protein cabin-1. May be required for replication-independent chromatin assembly. May serve as a negative regulator of T-cell receptor (TCR) signaling via inhibition of calcineurin. Inhibition of activated calcineurin is dependent on both PKC and calcium signals. Acts as a negative regulator of p53/TP53 by keeping p53 in an inactive state on chromatin at promoters of a subset of it's target genes. | TFs/transcription                 |
| NVE18895                             | XM_032366377   | neurogenic locus notch homolog protein 1                                                                                                                                                                                                                                                                                                                                                                                            | Notch signaling                   |

|          |                                         |                                                                                                                                                                                                                                                                                                                                                                                                |                     |
|----------|-----------------------------------------|------------------------------------------------------------------------------------------------------------------------------------------------------------------------------------------------------------------------------------------------------------------------------------------------------------------------------------------------------------------------------------------------|---------------------|
| NVE23097 | XR_004295937                            | misc_RNA                                                                                                                                                                                                                                                                                                                                                                                       | misc_RNA            |
| NVE21821 | XM_032362584                            | bromodomain-containing protein 7 - is a transcription regulator that is normally highly expressed in the testis, Acts both as coactivator and as corepressor. May play a role in chromatin remodeling. Activator of the Wnt signaling pathway in a DVL1-dependent manner by negatively regulating the GSK3B phosphotransferase activity.                                                       | TFs/transcription   |
| NVE2281  | XM_032379039                            | uncharacterized, blast hit - transient receptor potential protein 5 [Mus musculus, homo sapiens], receptor-activated non-selective calcium permeant cation channel, transient receptor potential 5 TRPC5 (also TrpC5, trp-5 or trp5) is one of the seven mammalian TRPC proteins. Its known functional property is that of a mixed cationic plasma membrane channel with calcium permeability. | membrane transport  |
| NVE5335  | DQ518750,<br>BR000683 ,<br>XM_032362962 | Mox gene cluster, gene for opsin (match - melanopsin [mus musculus]), Photoreceptor required for regulation of circadian rhythm. Contributes to pupillar reflex and other non-image forming responses to light. May be able to isomerize covalently bound all-trans retinal back to 11-cis retinal.                                                                                            | TFs/transcription   |
| NVE25263 | XM_001640126                            | proton channel OtopLc. Proton-selective channel that specifically transports protons into cells. Proton-selective channel activity is probably required in cell types that use changes in intracellular pH for cell signaling or to regulate biochemical or developmental processes.                                                                                                           | membrane transport  |
| NVE1719  | XM_032379414                            | piwi-like protein 1, Endoribonuclease that plays a central role in postnatal germ cells by repressing transposable elements and preventing their mobilization, which is essential for the germline integrity.                                                                                                                                                                                  | RT/retrotransposons |
| NVE3923  | XR_004293389                            | ncRNA                                                                                                                                                                                                                                                                                                                                                                                          | ncRNA               |
| NVE13370 | XM_032372074                            | RT-like family, DUF5641 (protein domain family of unknown function).                                                                                                                                                                                                                                                                                                                           | RT/retrotransposons |
| NVE13426 | XM_001624701                            | formin-binding protein 4, protein containing two tryptophan-rich WW domains that binds the proline-rich formin homology 1 domains of formin family proteins, suggesting a role in the regulation of cytoskeletal dynamics during cell division and migration.                                                                                                                                  | cell motility       |
| NVE1653  | XM_032379482                            | transient receptor potential cation channel subfamily A member 1, Receptor-activated non-selective cation channel involved in pain detection and possibly also in cold perception, oxygen concentration perception, cough, itch, and inner ear function.                                                                                                                                       | membrane transport  |
| NVE24012 | XM_032365673                            | leukocyte receptor cluster member 8 (LENG8), signal transduction, genes involved in blood-brain barrier (BBB) formation and integrity (Schiavone et al, 2017), ubiquitous expression                                                                                                                                                                                                           | membrane transport  |

|                                    |              |                                                                                                                                                                                                                                                                                                                                                                                                          |                                          |
|------------------------------------|--------------|----------------------------------------------------------------------------------------------------------------------------------------------------------------------------------------------------------------------------------------------------------------------------------------------------------------------------------------------------------------------------------------------------------|------------------------------------------|
| NVE25595                           | XM_032380977 | tetratricopeptide repeat protein 12, The TTC12 gene encodes a protein containing several domains known to mediate protein-protein interactions and the assembly of multiprotein complexes. TTC12 is believed to play a role in the assembly of dynein arms in motile cilia in both human respiratory cells and sperm flagella                                                                            | Protein synthesis/processing/degradation |
| NVE5337                            | XM_001628627 | uncharacterized, blast hits - hypothetical proteins                                                                                                                                                                                                                                                                                                                                                      | uncharacterized/cnidaria-specific        |
| NVE14627                           | XM_032371433 | uncharacterized, blast hits - hypothetical proteins                                                                                                                                                                                                                                                                                                                                                      | uncharacterized/cnidaria-specific        |
| NVE4725                            | XM_032364135 | uncharacterized, RT, retrotransposon peptidase, zinc binding domain, retrotransposon                                                                                                                                                                                                                                                                                                                     | RT/retrotransposons                      |
| NVE24441                           | XM_032385326 | uncharacterized, blast hits - hypothetical proteins                                                                                                                                                                                                                                                                                                                                                      | uncharacterized/cnidaria-specific        |
| NVE9889                            | XM_032362858 | DNA excision repair protein ERCC-6-like 2. This gene encodes a member of the Snf2 family of helicase-like proteins. The encoded protein may play a role in DNA repair and mitochondrial function.                                                                                                                                                                                                        | DNA replication/repair                   |
| NVE1830                            | XM_032366645 | E3 ubiquitin-protein ligase TM129, same as NVE16319                                                                                                                                                                                                                                                                                                                                                      | Protein synthesis/processing/degradation |
| NVE21065                           | XM_032366926 | uncharacterized                                                                                                                                                                                                                                                                                                                                                                                          | uncharacterized/cnidaria-specific        |
| NVE25845                           | XM_032375707 | uncharacterized, same as NVE22531                                                                                                                                                                                                                                                                                                                                                                        | uncharacterized/cnidaria-specific        |
| NVE25715                           | XM_032366922 | uncharacterized, blast hit - LysM peptidoglycan-binding domain-containing protein [Moraxella sp.]                                                                                                                                                                                                                                                                                                        | uncharacterized/cnidaria-specific        |
| NVE8970                            | XM_032386874 | uncharacterized, blast hit - zinc-finger DNA-binding protein [Operophtera brumata]                                                                                                                                                                                                                                                                                                                       | TFs/transcription                        |
| NVE10940                           | XM_032373417 | adhesion G-protein coupled receptor D1-like (ADGRD1). Orphan receptor. Signals via G(s)-alpha family of G-proteins (PubMed:22025619, PubMed:22575658). Has protumorigenic function especially in glioblastoma (PubMed:27775701). Plays a role in cell-cell adhesion and neuron guidance via its interactions with FLRT2 and FLRT3 that are expressed at the surface of adjacent cells (PubMed:26235030). | ECM/cell adhesion                        |
| NVE20529                           | XM_032373468 | uncharacterized, protein unc-13 homolog C-like [Pocillopora damicornis]. May play a role in vesicle maturation during exocytosis as a target of the diacylglycerol second messenger pathway.                                                                                                                                                                                                             | endocytosis/exocytosis                   |
| NVE7559                            | XM_032370283 | uncharacterized, blast - no hits                                                                                                                                                                                                                                                                                                                                                                         | uncharacterized/cnidaria-specific        |
| NVE23107                           | XM_032381141 | uncharacterized, blast - no hits                                                                                                                                                                                                                                                                                                                                                                         | uncharacterized/cnidaria-specific        |
| <b>p-adj &lt; 0.1, upregulated</b> |              |                                                                                                                                                                                                                                                                                                                                                                                                          |                                          |

|                                    |              |                                                                                                                                                                                                                                                                                                                                                                                                                                                                                                  |                                          |
|------------------------------------|--------------|--------------------------------------------------------------------------------------------------------------------------------------------------------------------------------------------------------------------------------------------------------------------------------------------------------------------------------------------------------------------------------------------------------------------------------------------------------------------------------------------------|------------------------------------------|
| NVE8459                            | XM_032374949 | glycine-rich RNA-binding protein 7, Plays a role in RNA transcription or processing during stress. Binds RNAs and DNAs sequence with a preference to single-stranded nucleic acids. Displays strong affinity to poly(U) and poly(G) sequence. Involved in mRNA alternative splicing of numerous targets by modulating splice site selection.                                                                                                                                                     | RNA splicing                             |
| NVE13796                           | XM_032371808 | polycystic kidney disease protein 1-like 2, May function as an ion-channel regulator. May function as a G-protein-coupled receptor.                                                                                                                                                                                                                                                                                                                                                              | membrane transport                       |
| NVE3046                            | XM_001639565 | glutamic acid-rich protein                                                                                                                                                                                                                                                                                                                                                                                                                                                                       | TFs/transcription                        |
| <b>p-adj &lt; 0.2, upregulated</b> |              |                                                                                                                                                                                                                                                                                                                                                                                                                                                                                                  |                                          |
| NVE8526                            | XM_001627177 | uncharacterized, blast - no hits                                                                                                                                                                                                                                                                                                                                                                                                                                                                 | uncharacterized/cnidaria-specific        |
| NVE17842                           | XM_032385402 | uncharacterized, blast - no hits                                                                                                                                                                                                                                                                                                                                                                                                                                                                 | uncharacterized/cnidaria-specific        |
| NVE14450                           | XM_032371522 | uncharacterized, galactose-specific lectin [ <i>Anthopleura japonica</i> ]                                                                                                                                                                                                                                                                                                                                                                                                                       | ECM/cell adhesion                        |
| NVE8043                            | XM_001641744 | 40S ribosomal protein S23                                                                                                                                                                                                                                                                                                                                                                                                                                                                        | ribosome                                 |
| NVE11578                           | XM_001620758 | 40S ribosomal protein S9                                                                                                                                                                                                                                                                                                                                                                                                                                                                         | ribosome                                 |
| NVE9450                            | XM_001638285 | 60S ribosomal protein L30                                                                                                                                                                                                                                                                                                                                                                                                                                                                        | ribosome                                 |
| NVE12548                           | XM_032361981 | tetratricopeptide repeat protein 28-like, TTC28, During mitosis, may be involved in the condensation of spindle midzone microtubules, leading to the formation of midbody                                                                                                                                                                                                                                                                                                                        | Protein synthesis/processing/degradation |
| NVE2256                            | XM_001630433 | 60S ribosomal protein L34                                                                                                                                                                                                                                                                                                                                                                                                                                                                        | ribosome                                 |
| NVE2295                            | XM_001630427 | 60S ribosomal protein L42-A                                                                                                                                                                                                                                                                                                                                                                                                                                                                      | ribosome                                 |
| NVE7522                            | XM_032363570 | calponin-1, Calponin 1 is a basic smooth muscle protein, The expression of CNN1 is specific to differentiated mature smooth muscle cells, suggesting a role in contractile functions.                                                                                                                                                                                                                                                                                                            | cell motility                            |
| NVE8334                            | XM_032363335 | neurogenic locus notch homolog protein 1-like                                                                                                                                                                                                                                                                                                                                                                                                                                                    | Notch signaling                          |
| NVE21167                           | XM_001634346 | LWamide neuropeptides                                                                                                                                                                                                                                                                                                                                                                                                                                                                            | Neuroactive ligand-receptor              |
| NVE6169                            | XM_032363930 | uncharacterized, blast - Fert2 protein, partial [ <i>Mus musculus</i> ], Tyrosine-protein kinase that acts downstream of cell surface receptors for growth factors and plays a role in the regulation of the actin cytoskeleton, microtubule assembly, lamellipodia formation, cell adhesion, cell migration and chemotaxis. Plays a role in synapse organization, trafficking of synaptic vesicles, the generation of excitatory postsynaptic currents and neuron-neuron synaptic transmission. | cell motility                            |
| NVE9019                            | XM_032374594 | B-cell lymphoma 3 protein (BCL3) Contributes to the regulation of transcriptional activation of NF-kappa-B target genes. In the cytoplasm,                                                                                                                                                                                                                                                                                                                                                       | NF-kappa B                               |



|                                      |              |                                                                                                                                                                                                                                                                                                                                                                                                                                                  |                                   |
|--------------------------------------|--------------|--------------------------------------------------------------------------------------------------------------------------------------------------------------------------------------------------------------------------------------------------------------------------------------------------------------------------------------------------------------------------------------------------------------------------------------------------|-----------------------------------|
|                                      |              | inhibits the nuclear translocation of the NF-kappa-B p50 subunit. In the nucleus, acts as a transcriptional activator that promotes transcription of NF-kappa-B target genes. Contributes to the regulation of cell proliferation                                                                                                                                                                                                                |                                   |
| NVE2142                              | XM_032364650 | beta-ketoacyl-ACP synthase 3 [Nocardioides sp. SLBN-35], Beta-ketoacyl-ACP synthase is found as a component of a number of enzymatic systems, including fatty acid synthetase (FAS)                                                                                                                                                                                                                                                              | lipid metabolism                  |
| NVE7499                              | XM_032363508 | TNFAIP3-interacting protein 3-like, Binds to zinc finger protein TNFAIP3 and inhibits NF-kappa-B activation induced by tumor necrosis factor, Toll-like receptor 4 (TLR4), interleukin-1 and 12-O-tetradecanoylphorbol-13-acetate. Overexpression inhibits NF-kappa-B-dependent gene expression in response to lipopolysaccharide at a level downstream of TRAF6 and upstream of IKBKB. NF-kappa-B inhibition is independent of TNFAIP3 binding. | NF-kappa B                        |
| <b>p-adj &lt; 0.2, downregulated</b> |              |                                                                                                                                                                                                                                                                                                                                                                                                                                                  |                                   |
| NVE18073                             | XM_032385202 | sodium/glucose cotransporter 5, High capacity transporter for mannose and fructose and, to a lesser extent, glucose, AMG, and galactose. found in the intestinal mucosa (enterocytes) of the small intestine (SGLT1)                                                                                                                                                                                                                             | carbohydrate/energy metabolism    |
| NVE10425                             | XM_032362651 | KH homology domain-containing protein 4 - RNA-binding protein involved in pre-mRNA splicing.                                                                                                                                                                                                                                                                                                                                                     | RNA splicing                      |
| NVE10681                             | XM_032370200 | uncharacterized, blast hits - hypothetical proteins (cnidaria)                                                                                                                                                                                                                                                                                                                                                                                   | uncharacterized/cnidaria-specific |
| NVE16938                             | XM_032362591 | uncharacterized                                                                                                                                                                                                                                                                                                                                                                                                                                  | uncharacterized/cnidaria-specific |
| NVE5342                              | XM_032376858 | uncharacterized, RT-like superfamily, peptidase superfamily, DUF1759 unknown function                                                                                                                                                                                                                                                                                                                                                            | RT/retrotransposons               |
| NVE17112                             | XR_004297054 | ncRNA                                                                                                                                                                                                                                                                                                                                                                                                                                            | ncRNA                             |
| NVE13369                             | XR_004293601 | miscRNA                                                                                                                                                                                                                                                                                                                                                                                                                                          | miscRNA                           |
| NVE6128                              | XM_032363949 | uncharacterized, blast hits - other uncharacterized proteins (incl zebrafish)                                                                                                                                                                                                                                                                                                                                                                    | uncharacterized/cnidaria-specific |
| NVE5726                              | XM_032376662 | uncharacterized, blast hits - other uncharacterized proteins (cnidaria)                                                                                                                                                                                                                                                                                                                                                                          | uncharacterized/cnidaria-specific |
| NVE5672                              | XM_032376697 | sushi, von Willebrand factor type A, EGF and pentraxin domain-containing protein 1 (SVEP1) calcium ion binding and chromatin binding.                                                                                                                                                                                                                                                                                                            | ECM/cell adhesion                 |
| NVE24253                             | XM_032369598 | uncharacterized, blast hits - other uncharacterized proteins                                                                                                                                                                                                                                                                                                                                                                                     | uncharacterized/cnidaria-specific |
| NVE18659                             | XM_032369784 | uncharacterized, blast hits - other uncharacterized proteins                                                                                                                                                                                                                                                                                                                                                                                     | uncharacterized/cnidaria-specific |
| NVE23504                             | XR_004292166 | miscRNA                                                                                                                                                                                                                                                                                                                                                                                                                                          | miscRNA                           |
| NVE2560                              | XR_004293834 | ncRNA                                                                                                                                                                                                                                                                                                                                                                                                                                            | ncRNA                             |

|          |                |                                                                                                                                                                                                                                                                                    |                                   |
|----------|----------------|------------------------------------------------------------------------------------------------------------------------------------------------------------------------------------------------------------------------------------------------------------------------------------|-----------------------------------|
| NVE10977 | XM_032373395   | uncharacterized, Reverse transcriptase (RTs) in retrotransposons. This subfamily represents the RT domain of a multifunctional enzyme.                                                                                                                                             | RT/retrotransposons               |
| NVE19504 | XM_032369412   | EGF-like repeat and discoïdin I-like domain-containing protein 3 (same as NVE20550)                                                                                                                                                                                                | ECM/cell adhesion                 |
| NVE14525 | XM_032386819   | flocculation protein FLO11-like, Cell wall protein that participates in adhesive cell-cell interactions during yeast flocculation, a reversible, asexual and Ca <sup>2+</sup> -dependent process in which cells adhere to form aggregates (flocs) consisting of thousands of cells | ECM/cell adhesion                 |
| NVE10424 | XM_032362651   | KH homology domain-containing protein 4                                                                                                                                                                                                                                            | RNA splicing                      |
| NVE9099  | XM_032374520   | multidrug resistance-associated protein 4, belongs to the ATP-binding cassette (ABC) superfamily of transporters, is localized to the basolateral membrane of hepatocytes and the apical membrane of renal proximal tubule cells.                                                  | Membrane transport                |
| NVE22907 | XM_032371133   | autotransporter adhesin BpaC-like, Autotransporters form a large family of outer membrane proteins specifying diverse biological traits of Gram-negative bacteria                                                                                                                  | ECM/cell adhesion                 |
| NVE20069 | XM_032369520   | uncharacterized, SDK1, protein sidekick-1-like [Pocillopora damicornis]. Adhesion molecule that promotes lamina-specific synaptic connections in the retina.                                                                                                                       | ECM/cell adhesion                 |
| NVE1287  | XM_032365086   | thyroglobulin-like, Thyroglobulin (Tg) is a vertebrate secretory protein synthesized in the thyrocyte endoplasmic reticulum (ER)                                                                                                                                                   | ECM/cell adhesion                 |
| NVE9264  | XM_032374374   | myosin-11-like - Muscle contraction - It is a major contractile protein, converting chemical energy into mechanical energy through the hydrolysis of ATP.                                                                                                                          | cell motility                     |
| NVE15277 | XR_004293291   | ncRNA                                                                                                                                                                                                                                                                              | ncRNA                             |
| NVE11894 | XR_004295885   | ncRNA                                                                                                                                                                                                                                                                              | ncRNA                             |
| NVE6633  | XM_032376014   | uncharacterized, blast hits - other uncharacterized proteins, incl zn finger protein                                                                                                                                                                                               | uncharacterized/cnidaria-specific |
| NVE17538 | XM_032369784   | uncharacterized, blast hits - other uncharacterized proteins, same as NVE18659                                                                                                                                                                                                     | uncharacterized/cnidaria-specific |
| NVE4885  | XR_004292165.1 | miscRNA                                                                                                                                                                                                                                                                            | miscRNA                           |
| NVE22620 | XM_032382832   | tetratricopeptide repeat protein 14-like, TTC14, nucleic acid binding, function unknown                                                                                                                                                                                            | uncharacterized/cnidaria-specific |
| NVE9699  | XM_032374134   | uncharacterized, blast hits - other hypothetical proteins                                                                                                                                                                                                                          | uncharacterized/cnidaria-specific |
| NVE16190 | XR_004293155   | ncRNA                                                                                                                                                                                                                                                                              | ncRNA                             |

|          |              |                                                                                                                                                                                                                                                                                                                                                                                                                                                                                                                                                                          |                                       |
|----------|--------------|--------------------------------------------------------------------------------------------------------------------------------------------------------------------------------------------------------------------------------------------------------------------------------------------------------------------------------------------------------------------------------------------------------------------------------------------------------------------------------------------------------------------------------------------------------------------------|---------------------------------------|
| NVE11097 | XM_032369784 | same as NVE18659, uncharacterized                                                                                                                                                                                                                                                                                                                                                                                                                                                                                                                                        | uncharacterized/cnidaria-specific     |
| NVE15479 | XM_032386450 | multidrug resistance-associated protein 4, cystic fibrosis transmembrane conductance regulator [Mus musculus] - The CFTR gene codes for an ABC transporter-class ion channel protein that conducts chloride ions across epithelial cell membranes.                                                                                                                                                                                                                                                                                                                       | Membrane transport                    |
| NVE2545  | XR_004295885 | ncRNA                                                                                                                                                                                                                                                                                                                                                                                                                                                                                                                                                                    | ncRNA                                 |
| NVE20278 | XM_032386874 | uncharacterized, blast hits - hypothetical proteins                                                                                                                                                                                                                                                                                                                                                                                                                                                                                                                      | uncharacterized/cnidaria-specific     |
| NVE18894 | XM_032366394 | neurogenic locus notch homolog protein 1                                                                                                                                                                                                                                                                                                                                                                                                                                                                                                                                 | Notch signaling                       |
| NVE13408 | XM_032369784 | uncharacterized, blast hits -other uncharacterized proteins, same as NVE18659                                                                                                                                                                                                                                                                                                                                                                                                                                                                                            | uncharacterized/cnidaria-specific     |
| NVE17860 | XM_032385326 | uncharacterized, blast hits - hypothetical proteins of cnidaria and mollusca, same as NVE24441                                                                                                                                                                                                                                                                                                                                                                                                                                                                           | uncharacterized/cnidaria-specific     |
| NVE253   | XM_032367740 | uncharacterized, Collagen alpha-1(VII) chain [Exaiptasia pallida], collagen alpha-4(VI) chain isoform X1 [Mus musculus], integrin-like                                                                                                                                                                                                                                                                                                                                                                                                                                   | ECM/cell adhesion                     |
| NVE443   | XM_032380333 | EAAT1 (excitatory amino acid transporter 1)                                                                                                                                                                                                                                                                                                                                                                                                                                                                                                                              | Membrane transport, neurotransmission |
| NVE2551  | XR_004295429 | ncRNA                                                                                                                                                                                                                                                                                                                                                                                                                                                                                                                                                                    | ncRNA                                 |
| NVE12193 | XM_032362078 | adhesion G-protein coupled receptor V1-like, G-protein coupled receptor which has an essential role in the development of hearing and vision. In response to extracellular calcium, activates kinases PKA and PKC to regulate myelination by inhibiting the ubiquitination of MAG, thus enhancing the stability of this protein in myelin-forming cells of the auditory pathway. In retina photoreceptors, the USH2 complex is required for the maintenance of the periciliary membrane complex that seems to play a role in regulating intracellular protein transport. | ECM/cell adhesion                     |
| NVE17236 | XM_032370293 | proline-rich extensin-like protein EPR1, matches brevican isoform 1 variant, partial [Homo sapiens], In zebrafish matches neurocan core protein [Danio rerio]                                                                                                                                                                                                                                                                                                                                                                                                            | ECM/cell adhesion                     |
| NVE10653 | XM_001625963 | RAB11-binding protein RELCH homolog, Regulates intracellular cholesterol distribution from recycling endosomes to the trans-Golgi network through interactions with RAB11 and OSBP (PubMed:29514919). Functions in membrane tethering and promotes OSBP-mediated cholesterol transfer between RAB11-bound recycling endosomes and OSBP-bound Golgi-like membranes.                                                                                                                                                                                                       | lipid metabolism                      |

|          |              |                                                                                                                                                                                                                                                                                                                                                                                                                                                                                                                                                                                                                                                                                                                                                             |                             |
|----------|--------------|-------------------------------------------------------------------------------------------------------------------------------------------------------------------------------------------------------------------------------------------------------------------------------------------------------------------------------------------------------------------------------------------------------------------------------------------------------------------------------------------------------------------------------------------------------------------------------------------------------------------------------------------------------------------------------------------------------------------------------------------------------------|-----------------------------|
| NVE15290 | XM_032371075 | uncharacterized, blast hits - stabilin-1 [Homo sapiens], Acts as a scavenger receptor for acetylated low density lipoprotein. Binds to both Gram-positive and Gram-negative bacteria and may play a role in defense against bacterial infection. When inhibited in endothelial tube formation assays, there is a marked decrease in cell-cell interactions, suggesting a role in angiogenesis.                                                                                                                                                                                                                                                                                                                                                              | ECM/cell adhesion           |
| NVE18731 | XM_032384894 | P2Y purinoceptor 6-like, belongs to the family of G-protein coupled receptors.                                                                                                                                                                                                                                                                                                                                                                                                                                                                                                                                                                                                                                                                              | lipid metabolism            |
| NVE22894 | XM_032382668 | Trace amine-associated receptor 6-like, belongs to a class of G protein-coupled receptors. Trace amines are endogenous amine compounds that are chemically similar to classic biogenic amines like dopamine, norepinephrine, serotonin, and histamine. Trace amines were thought to be 'false transmitters' that displace classic biogenic amines from their storage and act on transporters in a fashion similar to the amphetamines, but the identification of brain receptors specific to trace amines indicates that they also have effects of their own. TAAR6 expressed in kidney and brain. In mouse TAAR6 is pecifically expressed in neurons of the olfactory epithelium, to discrete glomeruli predominantly localized to a confined bulb region. | neuroactive ligand-receptor |
| NVE16188 | XR_004293154 | ncRNA                                                                                                                                                                                                                                                                                                                                                                                                                                                                                                                                                                                                                                                                                                                                                       | ncRNA                       |
| NVE12757 | XM_032372270 | contactin-6 isoform X3 [Mus musculus], neuronal cell adhesion molecule isoform hh [Homo sapiens], the protein encoded by this gene is a member of the immunoglobulin superfamily. It is a glycosylphosphatidylinositol (GPI)-anchored neuronal membrane protein that functions as a cell adhesion molecule. It may play a role in the formation of axon connections in the developing nervous system.                                                                                                                                                                                                                                                                                                                                                       | ECM/cell adhesion           |
| NVE5666  | XM_032376690 | laminin subunit beta-2, Binding to cells via a high affinity receptor, laminin is thought to mediate the attachment, migration and organization of cells into tissues during embryonic development by interacting with other extracellular matrix components. Tissue specificity -Neuromuscular synapse and kidney glomerulus.                                                                                                                                                                                                                                                                                                                                                                                                                              | ECM/cell adhesion           |
| NVE5768  | XM_001628429 | protein HEXIM, Probable transcriptional regulator which functions as a general RNA polymerase II transcription inhibitor, Transcriptional regulator which functions as a general RNA polymerase II transcription inhibitor. In cooperation with 7SK snRNA sequesters P-TEFb in a large inactive 7SK snRNP complex preventing RNA polymerase II phosphorylation and subsequent transcriptional elongation.                                                                                                                                                                                                                                                                                                                                                   | TFs/transcription           |
| NVE1877  | XM_001630624 | uncharacterized, blast hits - Zinc finger protein 474 (human, mouse) - ZNF494, Predicted to have metal ion binding activity and nucleic acid binding activity.                                                                                                                                                                                                                                                                                                                                                                                                                                                                                                                                                                                              | TFs/transcription           |

|          |              |                                                                                                                                                                                                                                                                                                                                                                                                                                                   |                        |
|----------|--------------|---------------------------------------------------------------------------------------------------------------------------------------------------------------------------------------------------------------------------------------------------------------------------------------------------------------------------------------------------------------------------------------------------------------------------------------------------|------------------------|
| NVE13233 | XM_032382318 | ankyrin repeat and KH domain-containing protein 1-like, Could play pivotal roles in cell cycle and DNA regulation (PubMed:19150984). Involved in innate immune defense against virus by positively regulating the viral dsRNA receptors DDX58 and IFIH1 signaling pathways (PubMed:22328336).                                                                                                                                                     | immune response        |
| NVE24958 | XM_001632239 | histone-lysine N-methyltransferase 2D, Histone methyltransferase. Methylates 'Lys-4' of histone H3 (H3K4me). H3K4me represents a specific tag for epigenetic transcriptional activation. Acts as a coactivator for estrogen receptor by being recruited by ESR1, thereby activating transcription.                                                                                                                                                | TFs/transcription      |
| NVE2264  | XM_001630435 | PLA2_2, blast hits - basic phospholipase A2 nigexine, phospholipase A2 isoform 2 precursor [Mus musculus], Phospholipase A(2) (PLA(2)) enzymes are involved in lipid metabolism and, as such, are central to several cellular processes.                                                                                                                                                                                                          | lipid metabolism       |
| NVE23108 | LOC116607023 | ncRNA                                                                                                                                                                                                                                                                                                                                                                                                                                             | ncRNA                  |
| NVE12755 | XM_001624903 | adhesion G-protein coupled receptor D1, Orphan receptor. Signals via G(s)-alpha family of G-proteins (PubMed:22025619, PubMed:22575658). Has protumorigenic function especially in glioblastoma (PubMed:27775701), mus musculus - adhesion G protein-coupled receptor L3. Plays a role in cell-cell adhesion and neuron guidance via its interactions with FLRT2 and FLRT3 that are expressed at the surface of adjacent cells (PubMed:26235030). | ECM/cell adhesion      |
| NVE16286 | XM_032366658 | AP-5 complex subunit beta-1, As part of AP-5, a probable fifth adaptor protein complex it may be involved in endosomal transport, Adaptor protein complex 1 is found at the cytoplasmic face of coated vesicles located at the Golgi complex, where it mediates both the recruitment of clathrin to the membrane and the recognition of sorting signals within the cytosolic tails of transmembrane receptors.                                    | endocytosis/exocytosis |
| NVE17123 | XM_001636071 | pinin, Transcriptional activator binding to the E-box 1 core sequence of the E-cadherin promoter gene; the core-binding sequence is 5'CAGGTG-3'.                                                                                                                                                                                                                                                                                                  | TF/transcription       |
| NVE11362 | XM_032362383 | uncharacterized, blast hits - integrin and matrilin 1, cartilage matrix protein, isoform CRA_b [Homo sapiens], This gene encodes a member of von Willebrand factor A domain containing protein family.                                                                                                                                                                                                                                            | ECM/cell adhesion      |
| NVE23087 | XM_032371074 | volume-regulated anion channel subunit LRRC8E-like                                                                                                                                                                                                                                                                                                                                                                                                | membrane transport     |
| NVE8748  | XM_032374695 | uncharacterized, collagen alpha-6(VI) chain isoform X2 [Xenopus tropicalis], von Willebrand factor type A domains, fibronectin type 2 domains, TSP type 1 repeats                                                                                                                                                                                                                                                                                 | ECM/cell adhesion      |
| NVE15008 | XM_032371244 | early endosome antigen 1-like, EEA1 localizes exclusively to early endosomes and has an important role in endosomal trafficking.                                                                                                                                                                                                                                                                                                                  | endocytosis/exocytosis |

|          |              |                                                                                                                                                                                                                                                                                                                 |                                   |
|----------|--------------|-----------------------------------------------------------------------------------------------------------------------------------------------------------------------------------------------------------------------------------------------------------------------------------------------------------------|-----------------------------------|
| NVE9385  | XM_032365376 | uncharacterized, blast hits - other uncharacterized proteins (cnidaria, moth, molluscs)                                                                                                                                                                                                                         | uncharacterized/cnidaria-specific |
| NVE5399  | XM_001639086 | UDP-N-acetylglucosamine--peptide N-acetylglucosaminyltransferase 110 kDa subunit, Catalyzes the transfer of a single N-acetylglucosamine from UDP-GlcNAc to a serine or threonine residue in cytoplasmic and nuclear proteins resulting in their modification with a beta-linked N-acetylglucosamine (O-GlcNAc) | protein modification              |
| NVE6210  | XM_032363854 | neurogenic locus notch homolog protein 1                                                                                                                                                                                                                                                                        | Notch signaling                   |
| NVE5945  | XM_032376466 | uncharacterized, thrombospondin 1, hemicentin-1 isoform X2 [Mus musculus], This gene encodes a large extracellular member of the immunoglobulin superfamily.                                                                                                                                                    | ECM/cell adhesion                 |
| NVE23760 | XM_001621826 | zinc metalloproteinase nas-6, Expressed in pharyngeal and body wall muscles, intestine, hypodermis and pharyngeal mc2 cells.                                                                                                                                                                                    | ECM/cell adhesion                 |
| NVE19786 | XM_032384482 | splicing factor 3B subunit 1, Involved in pre-mRNA splicing as a component of the splicing factor SF3B complex                                                                                                                                                                                                  | RNA splicing                      |
| NVE9070  | XM_032374535 | uncharacterized, blast hits - chymotrypsinogen B2 precursor [Homo sapiens], Chymotrypsin is a digestive enzyme component of pancreatic juice acting in the duodenum, where it performs proteolysis, the breakdown of proteins and polypeptides.                                                                 | protein degradation               |

**Supplementary Table 3. DE genes validated with RT-qPCR, their functional classification and RNA-seq attributes.**

| Gene symbol           | NCBI_name                                                                                                | NCBI_ID   | Ref.genome_ID | P-adj    | Log2FoldChange | Functional classification                      |
|-----------------------|----------------------------------------------------------------------------------------------------------|-----------|---------------|----------|----------------|------------------------------------------------|
| <i>Sorl1</i>          | sortilin-related receptor                                                                                | 5517308   | NVE13564      | 0.000    | -0.43007       | lipid metabolism                               |
| <i>Pla2_1</i>         | phospholipase A2<br>A2-actitoxin-Cgg2a                                                                   | 5512771   | NVE23561      | 0.006    | 0.36609        | lipid metabolism                               |
| <i>Pla2_2</i>         | basic phospholipase A2 CM-III                                                                            | 5509975   | NVE2264       | 0.169    | -0.25764       | lipid metabolism                               |
| <i>P2ry6-like</i>     | uncharacterized (new record), P2Y<br>purinoceptor 6-like (removed<br>record)                             | 116619764 | NVE18731      | 0.187    | -0.26629       | lipid metabolism                               |
| <i>Sglt5-like</i>     | sodium/glucose cotransporter<br>5-like                                                                   | 5515535   | NVE18073      | 0.101    | -0.30671       | glucose metabolism                             |
| <i>Pkm</i>            | pyruvate kinase PKM                                                                                      | 5522266   | NVE38         | 0.000    | -0.54460       | glucose metabolism                             |
| <i>Ogt</i>            | UDP-N-acetylglucosamine--peptide<br>N-acetylglucosaminyltransferase<br>110 kDa subunit                   | 5519150   | NVE5399       | 1.55E-01 | -0.23520       | post-translational<br>modification of proteins |
| <i>RPTPsigma-like</i> | receptor-type tyrosine-protein<br>phosphatase S-like                                                     | 5514256   | NVE25055      | 6.46E-04 | -0.42214       | post-translational<br>modification of proteins |
| <i>Zic4</i>           | zinc finger protein ZIC 4                                                                                | 5511658   | NVE8653       | 7.01E-03 | -0.37163       | TF                                             |
| <i>Ets-related</i>    | uncharacterized, Ets domain                                                                              | 5518230   | NVE9883       | 4.05E-04 | 0.43941        | TF                                             |
| <i>Lrrc8c-like</i>    | volume-regulated anion channel<br>subunit LRRRC8C-like                                                   | 116610263 | NVE23087      | 1.87E-01 | -0.24172       | ion channel                                    |
| <i>Trpa1-like</i>     | transient receptor potential cation<br>channel subfamily A member 1-like                                 | 5510332   | NVE1653       | 7.09E-02 | -0.29384       | ion channel                                    |
| <i>Pkd1l2</i>         | uncharacterized, PKD_channel<br>(new record); polycystic kidney<br>disease protein 1-like 2 (old record) | 5520736   | NVE22455      | 4.91E-02 | -0.32723       | ion channel                                    |

|                    |                                                                  |           |          |          |          |                   |
|--------------------|------------------------------------------------------------------|-----------|----------|----------|----------|-------------------|
| <i>Eaat1</i>       | excitatory amino acid transporter 1                              | 5511109   | NVE443   | 1.86E-01 | -0.27145 | neurotransmission |
| <i>Gat2</i>        | sodium- and chloride-dependent GABA transporter 2                | 5503381   | NVE14046 | NA       | NA       | neurotransmission |
| <i>Gat1</i>        | sodium- and chloride-dependent GABA transporter 1                | 5521615   | NVE16531 | NA       | NA       | neurotransmission |
| <i>Cntnap2</i>     | contactin-associated protein-like 2                              | 5510871   | NVE830   | 6.39E-03 | -0.38865 | ECM/cell adhesion |
| <i>Adgrf5</i>      | adhesion G protein-coupled receptor F5                           | 116611752 | NVE12757 | 1.16E-01 | -0.26555 | ECM/cell adhesion |
| <i>Sdk1</i>        | protein sidekick-1                                               | 116608285 | NVE20069 | 1.77E-01 | -0.28481 | ECM/cell adhesion |
| <i>Adgrv1-like</i> | adhesion G-protein coupled receptor V1-like                      | 116601365 | NVE12193 | 1.25E-01 | -0.26955 | ECM/cell adhesion |
| <i>Edil3</i>       | EGF-like repeat and discoidin I-like domain-containing protein 3 | 116608110 | NVE20550 | 2.39E-02 | -0.35463 | ECM/cell adhesion |
| <i>Notch1</i>      | neurogenic locus notch homolog protein 1                         | 5521105   | NVE18894 | 1.69E-01 | -0.27414 | Notch signaling   |
| <i>Mpeg-1</i>      | macrophage-expressed gene 1 protein                              | 5509442   | NVE3218  | 1.34E-02 | 0.35356  | immune response   |



**Supplementary Table 4. Gene-specific siRNAs used in this study.**

| Designation   | Target_Reg.genome_ID | Target_NCBI_ID   | Gene symbol    | Sense/antisense | Sequence                    | Designed by                     |
|---------------|----------------------|------------------|----------------|-----------------|-----------------------------|---------------------------------|
| siRNA1        | NVE12024             | 5495825, 5504408 | <i>NvGcm</i>   | s               | UUACCUGUGCAUUUCCUGU[dT][dT] | InvivoGen siRNA Wizard Software |
|               |                      |                  |                | a               | ACAGGAAAUGCACAGGUAA[dT][dT] |                                 |
| siRNA2        | NVE12024             | 5495825, 5504408 | <i>NvGcm</i>   | s               | CUACCCAAUGGACUCAAGAdTdT     | Sigma-Aldrich Japan             |
|               |                      |                  |                | a               | UCUUGAGUCCAUUGGGUAGdTdT     |                                 |
| control siRNA | n/a                  | n/a              | n/a            | s               | GCAACACGCAGAGTCGTAAdT       | Sigma-Aldrich Japan             |
|               |                      |                  |                | a               | TTACGACTCTGCGTGTTGCdT       |                                 |
| siRNA2        | NVE443               | 5511109          | <i>NvEaat1</i> | s               | CCUAUCAACGGCACACAUdTdT      | Sigma-Aldrich Japan             |
|               |                      |                  |                | a               | AUGUGUGCCGUUUGAUAGGdTdT     |                                 |
| siRNA3        | NVE443               | 5511109          | <i>NvEaat1</i> | s               | GUAUUACUUAGCUACGACUdTdT     | Sigma-Aldrich Japan             |
|               |                      |                  |                | a               | AGUCGUAGCUAAGUAAUACdTdT     |                                 |

**Supplementary Table 5. Sequencing depths and alignment rates of the RNA-seq libraries.** Libraries used for obtaining the final results are highlighted in **yellow**.

| Sample Name                         | Sample ID        | Total reads (millions) | Alignment rate |
|-------------------------------------|------------------|------------------------|----------------|
| HTKK5DSXX_PR1396_01A8080_H1_L002_R1 | siRNA1_1batch_1  | 79.3                   | 76%            |
| HTKK5DSXX_PR1396_01A8080_H1_L002_R2 | siRNA1_1batch_2  | 79.3                   |                |
| HTKK5DSXX_PR1396_02A8181_H1_L002_R1 | siRNA2_1batch_1  | 69.7                   | 77%            |
| HTKK5DSXX_PR1396_02A8181_H1_L002_R2 | siRNA2_1batch_2  | 69.7                   |                |
| HTKK5DSXX_PR1396_03A8282_H1_L002_R1 | control_1batch_1 | 56.1                   | 77%            |
| HTKK5DSXX_PR1396_03A8282_H1_L002_R2 | control_1batch_2 | 56.1                   |                |
| HTKK5DSXX_PR1396_04A8383_H1_L002_R1 | siRNA1_2batch_1  | 51.8                   | 76%            |
| HTKK5DSXX_PR1396_04A8383_H1_L002_R2 | siRNA1_2batch_2  | 51.8                   |                |
| HTKK5DSXX_PR1396_05A8484_H1_L002_R1 | siRNA2_2batch_1  | 76.7                   | 78%            |
| HTKK5DSXX_PR1396_05A8484_H1_L002_R2 | siRNA2_2batch_2  | 76.7                   |                |
| HTKK5DSXX_PR1396_06A8585_H1_L002_R1 | control_2batch_1 | 58.8                   | 76%            |
| HTKK5DSXX_PR1396_06A8585_H1_L002_R2 | control_2batch_2 | 58.8                   |                |
| HTKK5DSXX_PR1396_07A8686_H1_L002_R1 | siRNA1_3batch_1  | 54.5                   | 76%            |
| HTKK5DSXX_PR1396_07A8686_H1_L002_R2 | siRNA1_3batch_2  | 54.5                   |                |
| HTKK5DSXX_PR1396_08A8787_H1_L002_R1 | siRNA2_3batch_1  | 54.3                   | 76%            |
| HTKK5DSXX_PR1396_08A8787_H1_L002_R2 | siRNA2_3batch_2  | 54.3                   |                |
| HTKK5DSXX_PR1396_09A8989_H1_L002_R1 | control_3batch_1 | 70.1                   | 75%            |
| HTKK5DSXX_PR1396_09A8989_H1_L002_R2 | control_3batch_2 | 70.1                   |                |
| HTKK5DSXX_PR1396_10A9191_H1_L002_R1 | siRNA1_4batch_1  | 68.1                   | 76%            |
| HTKK5DSXX_PR1396_10A9191_H1_L002_R2 | siRNA1_4batch_2  | 68.1                   |                |
| HTKK5DSXX_PR1396_11A9292_H1_L002_R1 | siRNA2_4batch_1  | 64.6                   | 76%            |
| HTKK5DSXX_PR1396_11A9292_H1_L002_R2 | siRNA2_4batch_2  | 64.6                   |                |
| HTKK5DSXX_PR1396_12A9393_H1_L002_R1 | control_4batch_1 | 57.6                   | 77%            |
| HTKK5DSXX_PR1396_12A9393_H1_L002_R2 | control_4batch_2 | 57.6                   |                |

|                                     |                  |       |     |
|-------------------------------------|------------------|-------|-----|
| HTKK5DSXX_PR1396_13A9494_H1_L002_R1 | siRNA1_5batch_1  | 50.3  | 77% |
| HTKK5DSXX_PR1396_13A9494_H1_L002_R2 | siRNA1_5batch_2  | 50.3  |     |
| HTKK5DSXX_PR1396_14A9595_H1_L002_R1 | siRNA2_5batch_1  | 59.1  | 78% |
| HTKK5DSXX_PR1396_14A9595_H1_L002_R2 | siRNA2_5batch_2  | 59.1  |     |
| HTKK5DSXX_PR1396_15A9696_H1_L002_R1 | control_5batch_1 | 55.4  | 77% |
| HTKK5DSXX_PR1396_15A9696_H1_L002_R2 | control_5batch_2 | 55.4  |     |
|                                     | <b>mean</b>      | 61.76 | 76% |

**Supplementary Table 6. GO terms and function (UniProt) of DE genes in *NvGcm* siRNA1 vs control siRNA grouped by p-adj. \*DE genes identified in both siRNA2 vs cntrsiRNA and siRNA1 vs cntrsiRNA**

| <b>p-adj &lt; 0.05, downregulated</b> |                       |                                                                                                                                               |                                   |
|---------------------------------------|-----------------------|-----------------------------------------------------------------------------------------------------------------------------------------------|-----------------------------------|
| <b>Nv_vienna_ID</b>                   | <b>NCBI_accession</b> | <b>Function /BLAST hit</b>                                                                                                                    | <b>GO/KEGG pathway</b>            |
| NVE38*                                | XM_001641976          | pyruvate kinase PKM                                                                                                                           | carbohydrate/energy metabolism    |
| <b>p-adj &lt; 0.05, upregulated</b>   |                       |                                                                                                                                               |                                   |
| NVE9883*                              | XM_032362934.1        | uncharacterized, ETS domain containing                                                                                                        | TFs/transcription                 |
| NVE23912*                             | XM_032365681          | uncharacterized                                                                                                                               | uncharacterized/cnidaria-specific |
| NVE83                                 | XM_032367461          | fibulin-2, this gene encodes an extracellular matrix protein, which belongs to the fibulin family.                                            | cell adhesion                     |
| NVE13575                              | XM_001637235          | eukaryotic translation initiation factor 3 subunit A, RNA-binding component of the eukaryotic translation initiation factor 3 (eIF-3) complex | immune response                   |
| NVE12489                              | XM_001637508          | interferon regulatory factor 2 (IRF2) involved in cell cycle regulation                                                                       | TFs/transcription                 |
| NVE8271                               | XM_032363372          | CD59 glycoprotein [Exaiptasia pallida] involved in signal transduction for T-cell activation complexed to a protein tyrosine kinase.          | cell adhesion                     |
| NVE25578                              | XR_004295927          | ncRNA                                                                                                                                         | ncRNA                             |
| NVE14422                              | XM_001624274          | uncharacterized, domain: Rat sarcoma (Ras)-like superfamily of small guanosine triphosphatases (GTPases)                                      | metabolism                        |
| <b>p-adj &lt; 0.1, upregulated</b>    |                       |                                                                                                                                               |                                   |
| NVE18185                              | XM_032369985          | uncharacterized, similar to other uncharacterized proteins in cniderians                                                                      | uncharacterized/cnidaria-specific |
| NVE123                                | XM_032369985          | uncharacterized, similar to other uncharacterized proteins in cniderians                                                                      | uncharacterized/cnidaria-specific |

|                                    |              |                                                                                                                                                       |                                   |
|------------------------------------|--------------|-------------------------------------------------------------------------------------------------------------------------------------------------------|-----------------------------------|
| NVE2142                            | XM_032364650 | beta-ketoacyl-ACP synthase 3 [Nocardioides sp. SLBN-35], found as a component of a number of enzymatic systems, including fatty acid synthetase (FAS) | lipid metabolism                  |
| NVE2195                            |              | uncharacterized                                                                                                                                       | uncharacterized/cnidaria-specific |
| <b>p-adj &lt; 0.2, upregulated</b> |              |                                                                                                                                                       |                                   |
| NVE8874                            | XM_032363200 | cyclo(L-leucyl-L-leucyl) synthase-like, transferases, Acyltransferases; Aminoacyltransferases                                                         | lipid metabolism                  |
| NVE14423                           | XM_032371549 | uncharacterized                                                                                                                                       | uncharacterized/cnidaria-specific |
| NVE16514                           | XM_032366789 | uncharacterized                                                                                                                                       | uncharacterized/cnidaria-specific |
| NVE11672                           | XM_032372926 | uncharacterized                                                                                                                                       | uncharacterized/cnidaria-specific |

**Supplementary Table 7. Primer sequences and expected product sizes for genes used for RT-qPCR validation and cDNA contamination check.**

| Gene symbol             | Ref.genome_ID | NCBI_ID            | Primer sequence 5'-3'                                                | Expected product size (bp) |
|-------------------------|---------------|--------------------|----------------------------------------------------------------------|----------------------------|
| <i>NvNfix-like</i>      | NVE13116      | 5517439            | Forward: GACCCTCAGTCACCATCCATC<br>Reverse: ACTGAGCTACCCTTGACCCA      | cDNA: 850<br>gDNA: 1463    |
| <i>NvGcm</i>            | NVE12024      | 5495825<br>5504408 | Forward:CGACCCGCGATATCAGATAAA<br>Reverse:CTGTGCATTTCTGTGAGAGA        | 97                         |
| <i>NvEaat1</i>          | NVE443        | 5511109            | Forward: ACTCGAAGGAACCCGTTGAC<br>Reverse: GAATGGTGCATGGAAGGGTG       | 100                        |
| <i>NvGat2</i>           | NVE14046      | 5503381            | Forward: TTCTCGCCCTCTCCTCCATT<br>Reverse:GTGGTTACGCTCCTCAGACG        | 100                        |
| <i>NvGat1</i>           | NVE16531      | 5521615            | Forward: ACTCGGCAAAGAAGTCTCGG<br>Reverse: CCAGAAGGGTGAAATCGGCA       | 100                        |
| <i>Nv18S</i>            | NVE20421      | 125568448          | Forward: CTTAGATGTTCTGGGCCGCA<br>Reverse: CCAGCACGACGATGTTTCAC       | 100                        |
| <i>NvGapdh</i>          | NVE23813      | 5512587            | Forward: GGATGGACCAAGTGCCAAGAAC<br>Reverse: GCTTGCCGTTTACCTCAGGAATGA | 119                        |
| <i>NvEf1a</i>           | NVE12051      | 5504418            | Forward: GGTTGCCTCTTCGCTTACCACT<br>Reverse: CGTTCCTGGCTTTAGGACAC     | 101                        |
| <i>NvSor1</i>           | NVE13564      | 5517308            | Forward: TGTGACCGACCAACCATCTG<br>Reverse: GATGTGCCAGTCGTCGATCA       | 100                        |
| <i>NvRPTPsigma-like</i> | NVE25055      | 5514256            | Forward: AACTCAGCAAACACCACCCG<br>Reverse: ACCACCCGGGAGTGATCATA       | 100                        |
| <i>NvCntnap2</i>        | NVE830        | 5510871            | Forward: CCGCCTGGATCAGTAAAGGG<br>Reverse: GTCTTGCCCTTGGTCTGTGAT      | 100                        |
| <i>NvZic4</i>           | NVE8653       | 5511658            | Forward: TGCCGCGGATTGATCGTTAT<br>Reverse: AACATCGCGTTGGATGATGG       | 100                        |
| <i>NvPkd1I2</i>         | NVE22455      | 5520736            | Forward: CGGTTGATTCTCCAGAGGCT<br>Reverse: TCGTACTCGAACGGCTTTCC       | 100                        |

|                      |          |           |                                                                   |     |
|----------------------|----------|-----------|-------------------------------------------------------------------|-----|
| <i>NvTrpa1-like</i>  | NVE1653  | 5510332   | Forward: GTAGAGGCCTTGACTIONGAGC<br>Reverse: CCACCTTCCTGAAGCCACTG  | 100 |
| <i>NvSglt5-like</i>  | NVE18073 | 5515535   | Forward: TGGCGGTATGTGGAAGTGAG<br>Reverse: ACAGCCATCATCAGACCACG    | 100 |
| <i>NvSdk1</i>        | NVE20069 | 116608285 | Forward: CGCCTTTCTTGTCAAGTCGC<br>Reverse: CATCAGCACCGTCACTGCTA    | 100 |
| <i>NvAdgrv1-like</i> | NVE12193 | 116601365 | Forward: CAAGCAAGTCAACTGTTCCGGA<br>Reverse: GGCAGTGTACGCAGAAAATTG | 119 |
| <i>NvP2ry6-like</i>  | NVE18731 | 116619764 | Forward: CAACCCTGATGTCCATGCCA<br>Reverse: GAGGGCATCGAGTGAAAGGT    | 100 |
| <i>NvAdgrf5</i>      | NVE12757 | 116611752 | Forward: GTCAGCTGCGTTCATTGAGC<br>Reverse: ACCACGTCTAGAAACCCTGC    | 100 |
| <i>NvLrrc8c-like</i> | NVE23087 | 116610263 | Forward: ACTGCGCTTGGACATATAAGA<br>Reverse: TAGAGACGCGTACCGGGTTA   | 107 |
| <i>NvNotch1</i>      | NVE18894 | 5521105   | Forward: CTGGAGTGGTAAACCCTGCC<br>Reverse: AAGATGACAAACAGGCGGTCT   | 100 |
| <i>NvEts-related</i> | NVE9883  | 5518230   | Forward: GTGCATTGCTGAAATTGCTTCG<br>Reverse: GTGATTGGTTGATCGGTTGCC | 91  |
| <i>NvPla2_1</i>      | NVE23561 | 5512771   | Forward: CCAAGAGGACGCTATGAGGC<br>Reverse: TGATCGCTTCGCCACTTCTT    | 96  |
| <i>NvEdil3</i>       | NVE20550 | 116608110 | Forward: ATAACGAAACGGGCTGGTGC<br>Reverse: ATGCGTGAGGCTGAACAGTAA   | 107 |
| <i>NvOgt</i>         | NVE5399  | 5519150   | Forward: CCATTGAGACCCAGCCTAGC<br>Reverse: AAGTGGTGTATTGCCAGCCA    | 93  |
| <i>NvPkm</i>         | NVE38    | 5522266   | Forward: GCACCTTCGTTTTCGTGTCC<br>Reverse: GCGCGATGTGGATCTTCTCT    | 95  |
| <i>NvMpeg-1</i>      | NVE3218  | 5509442   | Forward: GGTTCCGGTAGTGTGAGTGGG<br>Reverse: TGTCGTAATTGCACACGGGT   | 100 |
| <i>NvPla2_2</i>      | NVE2264  | 5509975   | Forward: GCGGGGTTAGGTTAATTGTCC<br>Reverse: TTGCAACCATTTGGCTGTCC   | 94  |
